# Supplementary material for: Insights of fibroblast growth factor receptor 3 aberrations in pan-cancer and their roles in potential clinical treatment
Source: publisher site journal article supplement (doi:10.18632/aging.203175), 2021-06-23
Supplement: Supplementary file [file aging-v13i12-203175-supplementary-material-SD2.pdf]

## SUPPLEMENTARY TABLE

Supplementary Table 1. Summary of 32 TCGA tumor types and sample size.

| TCGA Cancer Abbreviation | TCGA Cancer Type                                                 | Sample Number |
|--------------------------|------------------------------------------------------------------|---------------|
| ACC                      | Adrenocortical carcinoma                                         | 92            |
| BLCA                     | Bladder urothelial carcinoma                                     | 411           |
| BRCA                     | Breast invasive carcinoma                                        | 1084          |
| CESC                     | Cervical squamous cell carcinoma and endocervical adenocarcinoma | 297           |
| CHOL                     | Cholangiocarcinoma                                               | 36            |
| COADREAD                 | Colon adenocarcinoma/Rectum adenocarcinoma                       | 594           |
| DLBC                     | Lymphoid neoplasm diffuse large B-cell lymphoma                  | 48            |
| ESCA                     | Esophageal carcinoma                                             | 182           |
| GBM                      | Glioblastoma multiforme                                          | 592           |
| HNSC                     | Head and Neck squamous cell carcinoma                            | 523           |
| KICH                     | Kidney chromophobe                                               | 65            |
| KIRC                     | Kidney renal clear cell carcinoma                                | 512           |
| KIRP                     | Kidney renal papillary cell carcinoma                            | 283           |
| LAML                     | Acute myeloid leukemia                                           | 200           |
| LGG                      | Brain lower grade glioma                                         | 513           |
| LIHC                     | Liver hepatocellular carcinoma                                   | 372           |
| LUAD                     | Lung adenocarcinoma                                              | 566           |
| LUSC                     | Lung squamous cell carcinoma                                     | 487           |
| MESO                     | Mesothelioma                                                     | 87            |
| OV                       | Ovarian serous cystadenocarcinoma                                | 585           |
| PAAD                     | Pancreatic adenocarcinoma                                        | 184           |
| PCPG                     | Pheochromocytoma and Paraganglioma                               | 178           |
| PRAD                     | Prostate adenocarcinoma                                          | 494           |
| SARC                     | Sarcoma                                                          | 255           |
| SKCM                     | Skin cutaneous melanoma                                          | 448           |
| STAD                     | Stomach adenocarcinoma                                           | 440           |
| TGCT                     | Testicular germ cell tumors                                      | 149           |
| THCA                     | Thyroid carcinoma                                                | 500           |
| THYM                     | Thymoma                                                          | 123           |
| UCEC                     | Uterine corpus endometrial carcinoma                             | 529           |
| UCS                      | Uterine carcinosarcoma                                           | 57            |
| UVM                      | Uveal Melanoma                                                   | 80            |
