# Supplementary material for: Insights of fibroblast growth factor receptor 3 aberrations in pan-cancer and their roles in potential clinical treatment
Source: Aging (Albany NY). 2021 Jun 23;13(12):16541–66. doi: 10.18632/aging.203175 (PMC8266346; doi:10.18632/aging.203175)
Supplement: Supplementary Table 2 [file aging-13-203175-s003.xlsx]

## Sheet: 工作表1
Supplementary Table 2. Detailed information about 234 FGFR3 somatic mutations from cBioPortal across 32 TCGA tumor types.
Study	Sample ID	Cancer Type	Protein Change	Annotation	Functional Impact	Mutation Type	Variant Type	Copy #	COSMIC	MS	VS	Center	Chromosome	Start Pos	End Pos	Ref	Var	HGVSg	HGVSc	Allele Freq (T)	Allele Freq (N)	Variant Reads	Ref Reads	Variant Reads (Normal)	Ref Reads (Normal)	# Mut in Sample	Exon	gnomAD	ClinVar ID	dbSNP
Bladder Urothelial Carcinoma (TCGA, PanCancer Atlas)	TCGA-2F-A9KR-01	Bladder Urothelial Carcinoma	S249C	OncoKB: Oncogenic, level_1;CIViC: Functional: 5, Predictive: 9, Diagnostic: 1;MyCancerGenome: not present;CancerHotspot: yes;3DHotspot: yes	MutationAssessor: impact: high, score: 3.885;SIFT: impact: deleterious, score: 0.01;Polyphen-2: impact: probably_damaging, score: 0.968	Missense_Mutation	SNP	diploid	1251	.	.	.	4	1803568	1803568	C	G	4:g.1803568C>G	ENST00000260795.2:c.746C>G	0.56		19	15		20	211	2020-06-17
Bladder Urothelial Carcinoma (TCGA, PanCancer Atlas)	TCGA-2F-A9KT-01	Bladder Urothelial Carcinoma	S249C	OncoKB: Oncogenic, level_1;CIViC: Functional: 5, Predictive: 9, Diagnostic: 1;MyCancerGenome: not present;CancerHotspot: yes;3DHotspot: yes	MutationAssessor: impact: high, score: 3.885;SIFT: impact: deleterious, score: 0.01;Polyphen-2: impact: probably_damaging, score: 0.968	Missense_Mutation	SNP	amp	1251	.	.	.	4	1803568	1803568	C	G	4:g.1803568C>G	ENST00000260795.2:c.746C>G	0.4		8	12		23	338	2020-06-17
Bladder Urothelial Carcinoma (TCGA, PanCancer Atlas)	TCGA-4Z-AA7Y-01	Bladder Urothelial Carcinoma	S249C	OncoKB: Oncogenic, level_1;CIViC: Functional: 5, Predictive: 9, Diagnostic: 1;MyCancerGenome: not present;CancerHotspot: yes;3DHotspot: yes	MutationAssessor: impact: high, score: 3.885;SIFT: impact: deleterious, score: 0.01;Polyphen-2: impact: probably_damaging, score: 0.968	Missense_Mutation	SNP	amp	1251	.	.	.	4	1803568	1803568	C	G	4:g.1803568C>G	ENST00000260795.2:c.746C>G	0.99		71	1		23	263	2020-06-17
Bladder Urothelial Carcinoma (TCGA, PanCancer Atlas)	TCGA-4Z-AA83-01	Bladder Urothelial Carcinoma	S249C	OncoKB: Oncogenic, level_1;CIViC: Functional: 5, Predictive: 9, Diagnostic: 1;MyCancerGenome: not present;CancerHotspot: yes;3DHotspot: yes	MutationAssessor: impact: high, score: 3.885;SIFT: impact: deleterious, score: 0.01;Polyphen-2: impact: probably_damaging, score: 0.968	Missense_Mutation	SNP	diploid	1251	.	.	.	4	1803568	1803568	C	G	4:g.1803568C>G	ENST00000260795.2:c.746C>G	0.74		17	6		22	75	2020-06-17
Bladder Urothelial Carcinoma (TCGA, PanCancer Atlas)	TCGA-4Z-AA89-01	Bladder Urothelial Carcinoma	S249C	OncoKB: Oncogenic, level_1;CIViC: Functional: 5, Predictive: 9, Diagnostic: 1;MyCancerGenome: not present;CancerHotspot: yes;3DHotspot: yes	MutationAssessor: impact: high, score: 3.885;SIFT: impact: deleterious, score: 0.01;Polyphen-2: impact: probably_damaging, score: 0.968	Missense_Mutation	SNP	diploid	1251	.	.	.	4	1803568	1803568	C	G	4:g.1803568C>G	ENST00000260795.2:c.746C>G	0.52		11	10		20	125	2020-06-17
Bladder Urothelial Carcinoma (TCGA, PanCancer Atlas)	TCGA-CF-A27C-01	Bladder Urothelial Carcinoma	S249C	OncoKB: Oncogenic, level_1;CIViC: Functional: 5, Predictive: 9, Diagnostic: 1;MyCancerGenome: not present;CancerHotspot: yes;3DHotspot: yes	MutationAssessor: impact: high, score: 3.885;SIFT: impact: deleterious, score: 0.01;Polyphen-2: impact: probably_damaging, score: 0.968	Missense_Mutation	SNP	amp	1251	.	.	.	4	1803568	1803568	C	G	4:g.1803568C>G	ENST00000260795.2:c.746C>G	0.48		20	22		18	133	2020-06-17
Bladder Urothelial Carcinoma (TCGA, PanCancer Atlas)	TCGA-CF-A47V-01	Bladder Urothelial Carcinoma	S249C	OncoKB: Oncogenic, level_1;CIViC: Functional: 5, Predictive: 9, Diagnostic: 1;MyCancerGenome: not present;CancerHotspot: yes;3DHotspot: yes	MutationAssessor: impact: high, score: 3.885;SIFT: impact: deleterious, score: 0.01;Polyphen-2: impact: probably_damaging, score: 0.968	Missense_Mutation	SNP	amp	1251	.	.	.	4	1803568	1803568	C	G	4:g.1803568C>G	ENST00000260795.2:c.746C>G	0.85		141	25		40	66	2020-06-17
Bladder Urothelial Carcinoma (TCGA, PanCancer Atlas)	TCGA-CF-A7I0-01	Bladder Urothelial Carcinoma	S249C	OncoKB: Oncogenic, level_1;CIViC: Functional: 5, Predictive: 9, Diagnostic: 1;MyCancerGenome: not present;CancerHotspot: yes;3DHotspot: yes	MutationAssessor: impact: high, score: 3.885;SIFT: impact: deleterious, score: 0.01;Polyphen-2: impact: probably_damaging, score: 0.968	Missense_Mutation	SNP	diploid	1251	.	.	.	4	1803568	1803568	C	G	4:g.1803568C>G	ENST00000260795.2:c.746C>G	0.37		10	17		22	37	2020-06-17
Bladder Urothelial Carcinoma (TCGA, PanCancer Atlas)	TCGA-CF-A9FF-01	Bladder Urothelial Carcinoma	S249C	OncoKB: Oncogenic, level_1;CIViC: Functional: 5, Predictive: 9, Diagnostic: 1;MyCancerGenome: not present;CancerHotspot: yes;3DHotspot: yes	MutationAssessor: impact: high, score: 3.885;SIFT: impact: deleterious, score: 0.01;Polyphen-2: impact: probably_damaging, score: 0.968	Missense_Mutation	SNP	gain	1251	.	.	.	4	1803568	1803568	C	G	4:g.1803568C>G	ENST00000260795.2:c.746C>G	0.49		18	19		22	131	2020-06-17
Bladder Urothelial Carcinoma (TCGA, PanCancer Atlas)	TCGA-CF-A9FM-01	Bladder Urothelial Carcinoma	S249C	OncoKB: Oncogenic, level_1;CIViC: Functional: 5, Predictive: 9, Diagnostic: 1;MyCancerGenome: not present;CancerHotspot: yes;3DHotspot: yes	MutationAssessor: impact: high, score: 3.885;SIFT: impact: deleterious, score: 0.01;Polyphen-2: impact: probably_damaging, score: 0.968	Missense_Mutation	SNP	diploid	1251	.	.	.	4	1803568	1803568	C	G	4:g.1803568C>G	ENST00000260795.2:c.746C>G	0.48		12	13		24	21	2020-06-17
Bladder Urothelial Carcinoma (TCGA, PanCancer Atlas)	TCGA-CU-A72E-01	Bladder Urothelial Carcinoma	S249C	OncoKB: Oncogenic, level_1;CIViC: Functional: 5, Predictive: 9, Diagnostic: 1;MyCancerGenome: not present;CancerHotspot: yes;3DHotspot: yes	MutationAssessor: impact: high, score: 3.885;SIFT: impact: deleterious, score: 0.01;Polyphen-2: impact: probably_damaging, score: 0.968	Missense_Mutation	SNP	diploid	1251	.	.	.	4	1803568	1803568	C	G	4:g.1803568C>G	ENST00000260795.2:c.746C>G	0.77		23	7		41	91	2020-06-17
Bladder Urothelial Carcinoma (TCGA, PanCancer Atlas)	TCGA-DK-A1AG-01	Bladder Urothelial Carcinoma	S249C	OncoKB: Oncogenic, level_1;CIViC: Functional: 5, Predictive: 9, Diagnostic: 1;MyCancerGenome: not present;CancerHotspot: yes;3DHotspot: yes	MutationAssessor: impact: high, score: 3.885;SIFT: impact: deleterious, score: 0.01;Polyphen-2: impact: probably_damaging, score: 0.968	Missense_Mutation	SNP	diploid	1251	.	.	.	4	1803568	1803568	C	G	4:g.1803568C>G	ENST00000260795.2:c.746C>G	0.83		50	10		31	111	2020-06-17
Bladder Urothelial Carcinoma (TCGA, PanCancer Atlas)	TCGA-DK-AA77-01	Bladder Urothelial Carcinoma	S249C	OncoKB: Oncogenic, level_1;CIViC: Functional: 5, Predictive: 9, Diagnostic: 1;MyCancerGenome: not present;CancerHotspot: yes;3DHotspot: yes	MutationAssessor: impact: high, score: 3.885;SIFT: impact: deleterious, score: 0.01;Polyphen-2: impact: probably_damaging, score: 0.968	Missense_Mutation	SNP	diploid	1251	.	.	.	4	1803568	1803568	C	G	4:g.1803568C>G	ENST00000260795.2:c.746C>G	0.35		6	11		26	320	2020-06-17
Bladder Urothelial Carcinoma (TCGA, PanCancer Atlas)	TCGA-E5-A2PC-01	Bladder Urothelial Carcinoma	S249C	OncoKB: Oncogenic, level_1;CIViC: Functional: 5, Predictive: 9, Diagnostic: 1;MyCancerGenome: not present;CancerHotspot: yes;3DHotspot: yes	MutationAssessor: impact: high, score: 3.885;SIFT: impact: deleterious, score: 0.01;Polyphen-2: impact: probably_damaging, score: 0.968	Missense_Mutation	SNP	diploid	1251	.	.	.	4	1803568	1803568	C	G	4:g.1803568C>G	ENST00000260795.2:c.746C>G	0.35		14	26		19	206	2020-06-17
Bladder Urothelial Carcinoma (TCGA, PanCancer Atlas)	TCGA-E7-A3X6-01	Bladder Urothelial Carcinoma	S249C	OncoKB: Oncogenic, level_1;CIViC: Functional: 5, Predictive: 9, Diagnostic: 1;MyCancerGenome: not present;CancerHotspot: yes;3DHotspot: yes	MutationAssessor: impact: high, score: 3.885;SIFT: impact: deleterious, score: 0.01;Polyphen-2: impact: probably_damaging, score: 0.968	Missense_Mutation	SNP	diploid	1251	.	.	.	4	1803568	1803568	C	G	4:g.1803568C>G	ENST00000260795.2:c.746C>G	0.72		23	9		44	108	2020-06-17
Bladder Urothelial Carcinoma (TCGA, PanCancer Atlas)	TCGA-E7-A519-01	Bladder Urothelial Carcinoma	S249C	OncoKB: Oncogenic, level_1;CIViC: Functional: 5, Predictive: 9, Diagnostic: 1;MyCancerGenome: not present;CancerHotspot: yes;3DHotspot: yes	MutationAssessor: impact: high, score: 3.885;SIFT: impact: deleterious, score: 0.01;Polyphen-2: impact: probably_damaging, score: 0.968	Missense_Mutation	SNP	diploid	1251	.	.	.	4	1803568	1803568	C	G	4:g.1803568C>G	ENST00000260795.2:c.746C>G	0.26		5	14		40	66	2020-06-17
Bladder Urothelial Carcinoma (TCGA, PanCancer Atlas)	TCGA-E7-A678-01	Bladder Urothelial Carcinoma	S249C	OncoKB: Oncogenic, level_1;CIViC: Functional: 5, Predictive: 9, Diagnostic: 1;MyCancerGenome: not present;CancerHotspot: yes;3DHotspot: yes	MutationAssessor: impact: high, score: 3.885;SIFT: impact: deleterious, score: 0.01;Polyphen-2: impact: probably_damaging, score: 0.968	Missense_Mutation	SNP	diploid	1251	.	.	.	4	1803568	1803568	C	G	4:g.1803568C>G	ENST00000260795.2:c.746C>G	0.56		18	14		47	46	2020-06-17
Bladder Urothelial Carcinoma (TCGA, PanCancer Atlas)	TCGA-E7-A7DV-01	Bladder Urothelial Carcinoma	S249C	OncoKB: Oncogenic, level_1;CIViC: Functional: 5, Predictive: 9, Diagnostic: 1;MyCancerGenome: not present;CancerHotspot: yes;3DHotspot: yes	MutationAssessor: impact: high, score: 3.885;SIFT: impact: deleterious, score: 0.01;Polyphen-2: impact: probably_damaging, score: 0.968	Missense_Mutation	SNP	diploid	1251	.	.	.	4	1803568	1803568	C	G	4:g.1803568C>G	ENST00000260795.2:c.746C>G	0.33		14	28		23	492	2020-06-17
Bladder Urothelial Carcinoma (TCGA, PanCancer Atlas)	TCGA-E7-A7XN-01	Bladder Urothelial Carcinoma	S249C	OncoKB: Oncogenic, level_1;CIViC: Functional: 5, Predictive: 9, Diagnostic: 1;MyCancerGenome: not present;CancerHotspot: yes;3DHotspot: yes	MutationAssessor: impact: high, score: 3.885;SIFT: impact: deleterious, score: 0.01;Polyphen-2: impact: probably_damaging, score: 0.968	Missense_Mutation	SNP	diploid	1251	.	.	.	4	1803568	1803568	C	G	4:g.1803568C>G	ENST00000260795.2:c.746C>G	0.3		13	31		27	861	2020-06-17
Bladder Urothelial Carcinoma (TCGA, PanCancer Atlas)	TCGA-FD-A3SM-01	Bladder Urothelial Carcinoma	S249C	OncoKB: Oncogenic, level_1;CIViC: Functional: 5, Predictive: 9, Diagnostic: 1;MyCancerGenome: not present;CancerHotspot: yes;3DHotspot: yes	MutationAssessor: impact: high, score: 3.885;SIFT: impact: deleterious, score: 0.01;Polyphen-2: impact: probably_damaging, score: 0.968	Missense_Mutation	SNP	shallowdel	1251	.	.	.	4	1803568	1803568	C	G	4:g.1803568C>G	ENST00000260795.2:c.746C>G	0.3		12	28		45	185	2020-06-17
Bladder Urothelial Carcinoma (TCGA, PanCancer Atlas)	TCGA-FD-A43X-01	Bladder Urothelial Carcinoma	S249C	OncoKB: Oncogenic, level_1;CIViC: Functional: 5, Predictive: 9, Diagnostic: 1;MyCancerGenome: not present;CancerHotspot: yes;3DHotspot: yes	MutationAssessor: impact: high, score: 3.885;SIFT: impact: deleterious, score: 0.01;Polyphen-2: impact: probably_damaging, score: 0.968	Missense_Mutation	SNP	diploid	1251	.	.	.	4	1803568	1803568	C	G	4:g.1803568C>G	ENST00000260795.2:c.746C>G	0.53		29	26		51	287	2020-06-17
Bladder Urothelial Carcinoma (TCGA, PanCancer Atlas)	TCGA-FJ-A3ZE-01	Bladder Urothelial Carcinoma	S249C	OncoKB: Oncogenic, level_1;CIViC: Functional: 5, Predictive: 9, Diagnostic: 1;MyCancerGenome: not present;CancerHotspot: yes;3DHotspot: yes	MutationAssessor: impact: high, score: 3.885;SIFT: impact: deleterious, score: 0.01;Polyphen-2: impact: probably_damaging, score: 0.968	Missense_Mutation	SNP	diploid	1251	.	.	.	4	1803568	1803568	C	G	4:g.1803568C>G	ENST00000260795.2:c.746C>G	0.15		8	47		71	374	2020-06-17
Bladder Urothelial Carcinoma (TCGA, PanCancer Atlas)	TCGA-GC-A3BM-01	Bladder Urothelial Carcinoma	S249C	OncoKB: Oncogenic, level_1;CIViC: Functional: 5, Predictive: 9, Diagnostic: 1;MyCancerGenome: not present;CancerHotspot: yes;3DHotspot: yes	MutationAssessor: impact: high, score: 3.885;SIFT: impact: deleterious, score: 0.01;Polyphen-2: impact: probably_damaging, score: 0.968	Missense_Mutation	SNP	gain	1251	.	.	.	4	1803568	1803568	C	G	4:g.1803568C>G	ENST00000260795.2:c.746C>G	0.67		29	14		59	116	2020-06-17
Bladder Urothelial Carcinoma (TCGA, PanCancer Atlas)	TCGA-GU-A42R-01	Bladder Urothelial Carcinoma	S249C	OncoKB: Oncogenic, level_1;CIViC: Functional: 5, Predictive: 9, Diagnostic: 1;MyCancerGenome: not present;CancerHotspot: yes;3DHotspot: yes	MutationAssessor: impact: high, score: 3.885;SIFT: impact: deleterious, score: 0.01;Polyphen-2: impact: probably_damaging, score: 0.968	Missense_Mutation	SNP	gain	1251	.	.	.	4	1803568	1803568	C	G	4:g.1803568C>G	ENST00000260795.2:c.746C>G	0.81		46	11		51	131	2020-06-17
Bladder Urothelial Carcinoma (TCGA, PanCancer Atlas)	TCGA-GU-A763-01	Bladder Urothelial Carcinoma	S249C	OncoKB: Oncogenic, level_1;CIViC: Functional: 5, Predictive: 9, Diagnostic: 1;MyCancerGenome: not present;CancerHotspot: yes;3DHotspot: yes	MutationAssessor: impact: high, score: 3.885;SIFT: impact: deleterious, score: 0.01;Polyphen-2: impact: probably_damaging, score: 0.968	Missense_Mutation	SNP	diploid	1251	.	.	.	4	1803568	1803568	C	G	4:g.1803568C>G	ENST00000260795.2:c.746C>G	0.33		6	12		25	58	2020-06-17
Bladder Urothelial Carcinoma (TCGA, PanCancer Atlas)	TCGA-GU-AATQ-01	Bladder Urothelial Carcinoma	S249C	OncoKB: Oncogenic, level_1;CIViC: Functional: 5, Predictive: 9, Diagnostic: 1;MyCancerGenome: not present;CancerHotspot: yes;3DHotspot: yes	MutationAssessor: impact: high, score: 3.885;SIFT: impact: deleterious, score: 0.01;Polyphen-2: impact: probably_damaging, score: 0.968	Missense_Mutation	SNP	diploid	1251	.	.	.	4	1803568	1803568	C	G	4:g.1803568C>G	ENST00000260795.2:c.746C>G	0.63		12	7		36	148	2020-06-17
Bladder Urothelial Carcinoma (TCGA, PanCancer Atlas)	TCGA-H4-A2HQ-01	Bladder Urothelial Carcinoma	S249C	OncoKB: Oncogenic, level_1;CIViC: Functional: 5, Predictive: 9, Diagnostic: 1;MyCancerGenome: not present;CancerHotspot: yes;3DHotspot: yes	MutationAssessor: impact: high, score: 3.885;SIFT: impact: deleterious, score: 0.01;Polyphen-2: impact: probably_damaging, score: 0.968	Missense_Mutation	SNP	shallowdel	1251	.	.	.	4	1803568	1803568	C	G	4:g.1803568C>G	ENST00000260795.2:c.746C>G	0.61		30	19		62	426	2020-06-17
Bladder Urothelial Carcinoma (TCGA, PanCancer Atlas)	TCGA-LT-A8JT-01	Bladder Urothelial Carcinoma	S249C	OncoKB: Oncogenic, level_1;CIViC: Functional: 5, Predictive: 9, Diagnostic: 1;MyCancerGenome: not present;CancerHotspot: yes;3DHotspot: yes	MutationAssessor: impact: high, score: 3.885;SIFT: impact: deleterious, score: 0.01;Polyphen-2: impact: probably_damaging, score: 0.968	Missense_Mutation	SNP	diploid	1251	.	.	.	4	1803568	1803568	C	G	4:g.1803568C>G	ENST00000260795.2:c.746C>G	1		17			14	71	2020-06-17
Bladder Urothelial Carcinoma (TCGA, PanCancer Atlas)	TCGA-XF-A8HE-01	Bladder Urothelial Carcinoma	S249C	OncoKB: Oncogenic, level_1;CIViC: Functional: 5, Predictive: 9, Diagnostic: 1;MyCancerGenome: not present;CancerHotspot: yes;3DHotspot: yes	MutationAssessor: impact: high, score: 3.885;SIFT: impact: deleterious, score: 0.01;Polyphen-2: impact: probably_damaging, score: 0.968	Missense_Mutation	SNP	diploid	1251	.	.	.	4	1803568	1803568	C	G	4:g.1803568C>G	ENST00000260795.2:c.746C>G	0.21		6	22		14	378	2020-06-17
Bladder Urothelial Carcinoma (TCGA, PanCancer Atlas)	TCGA-XF-A8HI-01	Bladder Urothelial Carcinoma	S249C	OncoKB: Oncogenic, level_1;CIViC: Functional: 5, Predictive: 9, Diagnostic: 1;MyCancerGenome: not present;CancerHotspot: yes;3DHotspot: yes	MutationAssessor: impact: high, score: 3.885;SIFT: impact: deleterious, score: 0.01;Polyphen-2: impact: probably_damaging, score: 0.968	Missense_Mutation	SNP	diploid	1251	.	.	.	4	1803568	1803568	C	G	4:g.1803568C>G	ENST00000260795.2:c.746C>G	0.25		5	15		12	66	2020-06-17
Bladder Urothelial Carcinoma (TCGA, PanCancer Atlas)	TCGA-XF-A9SV-01	Bladder Urothelial Carcinoma	S249C	OncoKB: Oncogenic, level_1;CIViC: Functional: 5, Predictive: 9, Diagnostic: 1;MyCancerGenome: not present;CancerHotspot: yes;3DHotspot: yes	MutationAssessor: impact: high, score: 3.885;SIFT: impact: deleterious, score: 0.01;Polyphen-2: impact: probably_damaging, score: 0.968	Missense_Mutation	SNP	diploid	1251	.	.	.	4	1803568	1803568	C	G	4:g.1803568C>G	ENST00000260795.2:c.746C>G	0.46		11	13		29	63	2020-06-17
Bladder Urothelial Carcinoma (TCGA, PanCancer Atlas)	TCGA-ZF-A9R2-01	Bladder Urothelial Carcinoma	S249C	OncoKB: Oncogenic, level_1;CIViC: Functional: 5, Predictive: 9, Diagnostic: 1;MyCancerGenome: not present;CancerHotspot: yes;3DHotspot: yes	MutationAssessor: impact: high, score: 3.885;SIFT: impact: deleterious, score: 0.01;Polyphen-2: impact: probably_damaging, score: 0.968	Missense_Mutation	SNP	gain	1251	.	.	.	4	1803568	1803568	C	G	4:g.1803568C>G	ENST00000260795.2:c.746C>G	0.93		26	2		24	134	2020-06-17
Bladder Urothelial Carcinoma (TCGA, PanCancer Atlas)	TCGA-BT-A0S7-01	Bladder Urothelial Carcinoma	R248C	OncoKB: Oncogenic, level_1;CIViC: Predictive: 6, Functional: 2;MyCancerGenome: not present;CancerHotspot: yes;3DHotspot: yes	MutationAssessor: impact: high, score: 4.055;SIFT: impact: deleterious, score: 0;Polyphen-2: impact: probably_damaging, score: 0.959	Missense_Mutation	SNP	diploid	250	.	.	.	4	1803564	1803564	C	T	4:g.1803564C>T	ENST00000260795.2:c.742C>T	0.38		10	16		29	37	2020-06-17
Bladder Urothelial Carcinoma (TCGA, PanCancer Atlas)	TCGA-CF-A47Y-01	Bladder Urothelial Carcinoma	R248C	OncoKB: Oncogenic, level_1;CIViC: Predictive: 6, Functional: 2;MyCancerGenome: not present;CancerHotspot: yes;3DHotspot: yes	MutationAssessor: impact: high, score: 4.055;SIFT: impact: deleterious, score: 0;Polyphen-2: impact: probably_damaging, score: 0.959	Missense_Mutation	SNP	diploid	250	.	.	.	4	1803564	1803564	C	T	4:g.1803564C>T	ENST00000260795.2:c.742C>T	0.65		13	7		43	59	2020-06-17
Bladder Urothelial Carcinoma (TCGA, PanCancer Atlas)	TCGA-FJ-A3ZE-01	Bladder Urothelial Carcinoma	R248C	OncoKB: Oncogenic, level_1;CIViC: Predictive: 6, Functional: 2;MyCancerGenome: not present;CancerHotspot: yes;3DHotspot: yes	MutationAssessor: impact: high, score: 4.055;SIFT: impact: deleterious, score: 0;Polyphen-2: impact: probably_damaging, score: 0.959	Missense_Mutation	SNP	diploid	250	.	.	.	4	1803564	1803564	C	T	4:g.1803564C>T	ENST00000260795.2:c.742C>T	0.14		7	43		69	374	2020-06-17
Bladder Urothelial Carcinoma (TCGA, PanCancer Atlas)	TCGA-2F-A9KQ-01	Bladder Urothelial Carcinoma	Y373C	OncoKB: Oncogenic, level_1;CIViC: Predictive: 3, Functional: 5;MyCancerGenome: not present;CancerHotspot: yes;3DHotspot: no	MutationAssessor: impact: medium, score: 2.43;SIFT: impact: deleterious, score: 0;Polyphen-2: impact: possibly_damaging, score: 0.896	Missense_Mutation	SNP	diploid	421	.	.	.	4	1806099	1806099	A	G	4:g.1806099A>G	ENST00000260795.2:c.1118A>G	0.45	0.0053	69	83	1	187	63	2020-08-17
Bladder Urothelial Carcinoma (TCGA, PanCancer Atlas)	TCGA-BT-A42C-01	Bladder Urothelial Carcinoma	Y373C	OncoKB: Oncogenic, level_1;CIViC: Predictive: 3, Functional: 5;MyCancerGenome: not present;CancerHotspot: yes;3DHotspot: no	MutationAssessor: impact: medium, score: 2.43;SIFT: impact: deleterious, score: 0;Polyphen-2: impact: possibly_damaging, score: 0.896	Missense_Mutation	SNP	shallowdel	421	.	.	.	4	1806099	1806099	A	G	4:g.1806099A>G	ENST00000260795.2:c.1118A>G	0.7		168	71		323	342	2020-08-17
Bladder Urothelial Carcinoma (TCGA, PanCancer Atlas)	TCGA-CF-A47W-01	Bladder Urothelial Carcinoma	Y373C	OncoKB: Oncogenic, level_1;CIViC: Predictive: 3, Functional: 5;MyCancerGenome: not present;CancerHotspot: yes;3DHotspot: no	MutationAssessor: impact: medium, score: 2.43;SIFT: impact: deleterious, score: 0;Polyphen-2: impact: possibly_damaging, score: 0.896	Missense_Mutation	SNP	diploid	421	.	.	.	4	1806099	1806099	A	G	4:g.1806099A>G	ENST00000260795.2:c.1118A>G	0.48		62	66		313	27	2020-08-17
Bladder Urothelial Carcinoma (TCGA, PanCancer Atlas)	TCGA-DK-A6B0-01	Bladder Urothelial Carcinoma	Y373C	OncoKB: Oncogenic, level_1;CIViC: Predictive: 3, Functional: 5;MyCancerGenome: not present;CancerHotspot: yes;3DHotspot: no	MutationAssessor: impact: medium, score: 2.43;SIFT: impact: deleterious, score: 0;Polyphen-2: impact: possibly_damaging, score: 0.896	Missense_Mutation	SNP	diploid	421	.	.	.	4	1806099	1806099	A	G	4:g.1806099A>G	ENST00000260795.2:c.1118A>G	0.92		252	23		278	24	2020-08-17
Bladder Urothelial Carcinoma (TCGA, PanCancer Atlas)	TCGA-DK-AA71-01	Bladder Urothelial Carcinoma	Y373C	OncoKB: Oncogenic, level_1;CIViC: Predictive: 3, Functional: 5;MyCancerGenome: not present;CancerHotspot: yes;3DHotspot: no	MutationAssessor: impact: medium, score: 2.43;SIFT: impact: deleterious, score: 0;Polyphen-2: impact: possibly_damaging, score: 0.896	Missense_Mutation	SNP	diploid	421	.	.	.	4	1806099	1806099	A	G	4:g.1806099A>G	ENST00000260795.2:c.1118A>G	0.59		83	58		156	594	2020-08-17
Bladder Urothelial Carcinoma (TCGA, PanCancer Atlas)	TCGA-E7-A5KF-01	Bladder Urothelial Carcinoma	Y373C	OncoKB: Oncogenic, level_1;CIViC: Predictive: 3, Functional: 5;MyCancerGenome: not present;CancerHotspot: yes;3DHotspot: no	MutationAssessor: impact: medium, score: 2.43;SIFT: impact: deleterious, score: 0;Polyphen-2: impact: possibly_damaging, score: 0.896	Missense_Mutation	SNP	diploid	421	.	.	.	4	1806099	1806099	A	G	4:g.1806099A>G	ENST00000260795.2:c.1118A>G	0.48		122	134		394	173	2020-08-17
Bladder Urothelial Carcinoma (TCGA, PanCancer Atlas)	TCGA-ZF-A9R5-01	Bladder Urothelial Carcinoma	Y373C	OncoKB: Oncogenic, level_1;CIViC: Predictive: 3, Functional: 5;MyCancerGenome: not present;CancerHotspot: yes;3DHotspot: no	MutationAssessor: impact: medium, score: 2.43;SIFT: impact: deleterious, score: 0;Polyphen-2: impact: possibly_damaging, score: 0.896	Missense_Mutation	SNP	diploid	421	.	.	.	4	1806099	1806099	A	G	4:g.1806099A>G	ENST00000260795.2:c.1118A>G	0.45		50	61		101	97	2020-08-17
Bladder Urothelial Carcinoma (TCGA, PanCancer Atlas)	TCGA-ZF-A9RE-01	Bladder Urothelial Carcinoma	Y373C	OncoKB: Oncogenic, level_1;CIViC: Predictive: 3, Functional: 5;MyCancerGenome: not present;CancerHotspot: yes;3DHotspot: no	MutationAssessor: impact: medium, score: 2.43;SIFT: impact: deleterious, score: 0;Polyphen-2: impact: possibly_damaging, score: 0.896	Missense_Mutation	SNP	shallowdel	421	.	.	.	4	1806099	1806099	A	G	4:g.1806099A>G	ENST00000260795.2:c.1118A>G	0.81		89	21		153	62	2020-08-17
Bladder Urothelial Carcinoma (TCGA, PanCancer Atlas)	TCGA-CF-A5U8-01	Bladder Urothelial Carcinoma	G370C	OncoKB: Likely Oncogenic, level_1;CIViC: Predictive: 2;MyCancerGenome: not present;CancerHotspot: yes;3DHotspot: no	MutationAssessor: impact: low, score: 1.905;SIFT: impact: deleterious, score: 0.04;Polyphen-2: impact: benign, score: 0.009	Missense_Mutation	SNP	diploid	116	.	.	.	4	1806089	1806089	G	T	4:g.1806089G>T	ENST00000260795.2:c.1108G>T	0.45		126	153		415	46	2020-08-17
Bladder Urothelial Carcinoma (TCGA, PanCancer Atlas)	TCGA-DK-AA6P-01	Bladder Urothelial Carcinoma	G370C	OncoKB: Likely Oncogenic, level_1;CIViC: Predictive: 2;MyCancerGenome: not present;CancerHotspot: yes;3DHotspot: no	MutationAssessor: impact: low, score: 1.905;SIFT: impact: deleterious, score: 0.04;Polyphen-2: impact: benign, score: 0.009	Missense_Mutation	SNP	diploid	116	.	.	.	4	1806089	1806089	G	T	4:g.1806089G>T	ENST00000260795.2:c.1108G>T	0.6		77	52		149	173	2020-08-17
Bladder Urothelial Carcinoma (TCGA, PanCancer Atlas)	TCGA-E7-A3Y1-01	Bladder Urothelial Carcinoma	G370C	OncoKB: Likely Oncogenic, level_1;CIViC: Predictive: 2;MyCancerGenome: not present;CancerHotspot: yes;3DHotspot: no	MutationAssessor: impact: low, score: 1.905;SIFT: impact: deleterious, score: 0.04;Polyphen-2: impact: benign, score: 0.009	Missense_Mutation	SNP	diploid	116	.	.	.	4	1806089	1806089	G	T	4:g.1806089G>T	ENST00000260795.2:c.1108G>T	0.38		102	167		302	152	2020-08-17
Bladder Urothelial Carcinoma (TCGA, PanCancer Atlas)	TCGA-E7-A7DU-01	Bladder Urothelial Carcinoma	G370C	OncoKB: Likely Oncogenic, level_1;CIViC: Predictive: 2;MyCancerGenome: not present;CancerHotspot: yes;3DHotspot: no	MutationAssessor: impact: low, score: 1.905;SIFT: impact: deleterious, score: 0.04;Polyphen-2: impact: benign, score: 0.009	Missense_Mutation	SNP	gain	116	.	.	.	4	1806089	1806089	G	T	4:g.1806089G>T	ENST00000260795.2:c.1108G>T	0.58		129	95		194	242	2020-08-17
Bladder Urothelial Carcinoma (TCGA, PanCancer Atlas)	TCGA-ZF-AA4U-01	Bladder Urothelial Carcinoma	G370C	OncoKB: Likely Oncogenic, level_1;CIViC: Predictive: 2;MyCancerGenome: not present;CancerHotspot: yes;3DHotspot: no	MutationAssessor: impact: low, score: 1.905;SIFT: impact: deleterious, score: 0.04;Polyphen-2: impact: benign, score: 0.009	Missense_Mutation	SNP	gain	116	.	.	.	4	1806089	1806089	G	T	4:g.1806089G>T	ENST00000260795.2:c.1108G>T	0.52		91	85		168	54	2020-08-17
Bladder Urothelial Carcinoma (TCGA, PanCancer Atlas)	TCGA-CF-A3MF-01	Bladder Urothelial Carcinoma	FGFR3-TACC3	OncoKB: Oncogenic, level_1;CIViC: Predictive: 3;MyCancerGenome: not present;CancerHotspot: no;3DHotspot: no	MutationAssessor: NA;SIFT: NA;Polyphen-2: NA	Fusion	NA	gain		NA	NA	WashU	NA	-1	-1	NA										23
Bladder Urothelial Carcinoma (TCGA, PanCancer Atlas)	TCGA-CF-A3MG-01	Bladder Urothelial Carcinoma	FGFR3-TACC3	OncoKB: Oncogenic, level_1;CIViC: Predictive: 3;MyCancerGenome: not present;CancerHotspot: no;3DHotspot: no	MutationAssessor: NA;SIFT: NA;Polyphen-2: NA	Fusion	NA	gain		NA	NA	WashU	NA	-1	-1	NA										126
Bladder Urothelial Carcinoma (TCGA, PanCancer Atlas)	TCGA-CF-A3MH-01	Bladder Urothelial Carcinoma	FGFR3-TACC3	OncoKB: Oncogenic, level_1;CIViC: Predictive: 3;MyCancerGenome: not present;CancerHotspot: no;3DHotspot: no	MutationAssessor: NA;SIFT: NA;Polyphen-2: NA	Fusion	NA	gain		NA	NA	WashU	NA	-1	-1	NA										43
Bladder Urothelial Carcinoma (TCGA, PanCancer Atlas)	TCGA-CF-A47S-01	Bladder Urothelial Carcinoma	FGFR3-TACC3	OncoKB: Oncogenic, level_1;CIViC: Predictive: 3;MyCancerGenome: not present;CancerHotspot: no;3DHotspot: no	MutationAssessor: NA;SIFT: NA;Polyphen-2: NA	Fusion	NA	diploid		NA	NA	WashU	NA	-1	-1	NA										27
Bladder Urothelial Carcinoma (TCGA, PanCancer Atlas)	TCGA-CF-A8HY-01	Bladder Urothelial Carcinoma	FGFR3-TACC3	OncoKB: Oncogenic, level_1;CIViC: Predictive: 3;MyCancerGenome: not present;CancerHotspot: no;3DHotspot: no	MutationAssessor: NA;SIFT: NA;Polyphen-2: NA	Fusion	NA	gain		NA	NA	WashU	NA	-1	-1	NA										89
Bladder Urothelial Carcinoma (TCGA, PanCancer Atlas)	TCGA-E7-A5KE-01	Bladder Urothelial Carcinoma	FGFR3-TACC3	OncoKB: Oncogenic, level_1;CIViC: Predictive: 3;MyCancerGenome: not present;CancerHotspot: no;3DHotspot: no	MutationAssessor: NA;SIFT: NA;Polyphen-2: NA	Fusion	NA	amp		NA	NA	WashU	NA	-1	-1	NA										171
Bladder Urothelial Carcinoma (TCGA, PanCancer Atlas)	TCGA-XF-AAMX-01	Bladder Urothelial Carcinoma	FGFR3-TACC3	OncoKB: Oncogenic, level_1;CIViC: Predictive: 3;MyCancerGenome: not present;CancerHotspot: no;3DHotspot: no	MutationAssessor: NA;SIFT: NA;Polyphen-2: NA	Fusion	NA	shallowdel		NA	NA	WashU	NA	-1	-1	NA										302
Bladder Urothelial Carcinoma (TCGA, PanCancer Atlas)	TCGA-XF-AAMZ-01	Bladder Urothelial Carcinoma	FGFR3-TACC3	OncoKB: Oncogenic, level_1;CIViC: Predictive: 3;MyCancerGenome: not present;CancerHotspot: no;3DHotspot: no	MutationAssessor: NA;SIFT: NA;Polyphen-2: NA	Fusion	NA	gain		NA	NA	WashU	NA	-1	-1	NA										267
Bladder Urothelial Carcinoma (TCGA, PanCancer Atlas)	TCGA-ZF-A9RG-01	Bladder Urothelial Carcinoma	K650E	OncoKB: Oncogenic, level_3a;CIViC: Predictive: 1;MyCancerGenome: not present;CancerHotspot: yes;3DHotspot: no	MutationAssessor: impact: low, score: 0.82;SIFT: impact: deleterious, score: 0;Polyphen-2: impact: probably_damaging, score: 0.999	Missense_Mutation	SNP	gain	96	.	.	.	4	1807889	1807889	A	G	4:g.1807889A>G	ENST00000260795.2:c.1948A>G	0.5		6	6		28	219	13/17
Bladder Urothelial Carcinoma (TCGA, PanCancer Atlas)	TCGA-ZF-A9RL-01	Bladder Urothelial Carcinoma	K650E	OncoKB: Oncogenic, level_3a;CIViC: Predictive: 1;MyCancerGenome: not present;CancerHotspot: yes;3DHotspot: no	MutationAssessor: impact: low, score: 0.82;SIFT: impact: deleterious, score: 0;Polyphen-2: impact: probably_damaging, score: 0.999	Missense_Mutation	SNP	diploid	96	.	.	.	4	1807889	1807889	A	G	4:g.1807889A>G	ENST00000260795.2:c.1948A>G	0.42		10	14		21	315	13/17
Bladder Urothelial Carcinoma (TCGA, PanCancer Atlas)	TCGA-BT-A20T-01	Bladder Urothelial Carcinoma	G380R	OncoKB: Likely Oncogenic, level_3a;CIViC: Predictive: 1;MyCancerGenome: not present;CancerHotspot: yes;3DHotspot: no	MutationAssessor: impact: low, score: 1.5;SIFT: impact: tolerated, score: 0.07;Polyphen-2: impact: benign, score: 0.255	Missense_Mutation	SNP	amp	14	.	.	.	4	1806119	1806119	G	A	4:g.1806119G>A	ENST00000260795.2:c.1138G>A	0.42		165	232		236	240	2020-08-17
Bladder Urothelial Carcinoma (TCGA, PanCancer Atlas)	TCGA-G2-A2EO-01	Bladder Urothelial Carcinoma	G380R	OncoKB: Likely Oncogenic, level_3a;CIViC: Predictive: 1;MyCancerGenome: not present;CancerHotspot: yes;3DHotspot: no	MutationAssessor: impact: low, score: 1.5;SIFT: impact: tolerated, score: 0.07;Polyphen-2: impact: benign, score: 0.255	Missense_Mutation	SNP	gain	14	.	.	.	4	1806119	1806119	G	A	4:g.1806119G>A	ENST00000260795.2:c.1138G>A	0.52		173	161		376	821	2020-08-17
Bladder Urothelial Carcinoma (TCGA, PanCancer Atlas)	TCGA-CF-A9FH-01	Bladder Urothelial Carcinoma	S371C	OncoKB: Likely Oncogenic, level_3a;CIViC: NA;MyCancerGenome: not present;CancerHotspot: yes;3DHotspot: no	MutationAssessor: impact: low, score: 1.245;SIFT: impact: deleterious, score: 0.03;Polyphen-2: impact: possibly_damaging, score: 0.682	Missense_Mutation	SNP	diploid	59	.	.	.	4	1806092	1806092	A	T	4:g.1806092A>T	ENST00000260795.2:c.1111A>T	0.95		158	8		220	38	2020-08-17
Bladder Urothelial Carcinoma (TCGA, PanCancer Atlas)	TCGA-XF-AAN1-01	Bladder Urothelial Carcinoma	S371C	OncoKB: Likely Oncogenic, level_3a;CIViC: NA;MyCancerGenome: not present;CancerHotspot: yes;3DHotspot: no	MutationAssessor: impact: low, score: 1.245;SIFT: impact: deleterious, score: 0.03;Polyphen-2: impact: possibly_damaging, score: 0.682	Missense_Mutation	SNP	diploid	59	.	.	.	4	1806092	1806092	A	T	4:g.1806092A>T	ENST00000260795.2:c.1111A>T	0.91		88	9		142	72	2020-08-17
Head and Neck Squamous Cell Carcinoma (TCGA, PanCancer Atlas)	TCGA-BA-A4IH-01	Head and Neck Squamous Cell Carcinoma	S249C	OncoKB: Oncogenic, level_3b;CIViC: Functional: 5, Predictive: 9, Diagnostic: 1;MyCancerGenome: not present;CancerHotspot: yes;3DHotspot: yes	MutationAssessor: impact: high, score: 3.885;SIFT: impact: deleterious, score: 0.01;Polyphen-2: impact: probably_damaging, score: 0.968	Missense_Mutation	SNP	diploid	1251	.	.	.	4	1803568	1803568	C	G	4:g.1803568C>G	ENST00000260795.2:c.746C>G	0.48		12	13		21	44	2020-06-17
Head and Neck Squamous Cell Carcinoma (TCGA, PanCancer Atlas)	TCGA-CN-A6V7-01	Head and Neck Squamous Cell Carcinoma	S249C	OncoKB: Oncogenic, level_3b;CIViC: Functional: 5, Predictive: 9, Diagnostic: 1;MyCancerGenome: not present;CancerHotspot: yes;3DHotspot: yes	MutationAssessor: impact: high, score: 3.885;SIFT: impact: deleterious, score: 0.01;Polyphen-2: impact: probably_damaging, score: 0.968	Missense_Mutation	SNP	diploid	1251	.	.	.	4	1803568	1803568	C	G	4:g.1803568C>G	ENST00000260795.2:c.746C>G	0.43		18	24		20	42	2020-06-17
Head and Neck Squamous Cell Carcinoma (TCGA, PanCancer Atlas)	TCGA-CR-6481-01	Head and Neck Squamous Cell Carcinoma	S249C	OncoKB: Oncogenic, level_3b;CIViC: Functional: 5, Predictive: 9, Diagnostic: 1;MyCancerGenome: not present;CancerHotspot: yes;3DHotspot: yes	MutationAssessor: impact: high, score: 3.885;SIFT: impact: deleterious, score: 0.01;Polyphen-2: impact: probably_damaging, score: 0.968	Missense_Mutation	SNP	diploid	1251	.	.	.	4	1803568	1803568	C	G	4:g.1803568C>G	ENST00000260795.2:c.746C>G	0.17		5	24		35	430	2020-06-17
Head and Neck Squamous Cell Carcinoma (TCGA, PanCancer Atlas)	TCGA-P3-A5QF-01	Head and Neck Squamous Cell Carcinoma	S249C	OncoKB: Oncogenic, level_3b;CIViC: Functional: 5, Predictive: 9, Diagnostic: 1;MyCancerGenome: not present;CancerHotspot: yes;3DHotspot: yes	MutationAssessor: impact: high, score: 3.885;SIFT: impact: deleterious, score: 0.01;Polyphen-2: impact: probably_damaging, score: 0.968	Missense_Mutation	SNP	diploid	1251	.	.	.	4	1803568	1803568	C	G	4:g.1803568C>G	ENST00000260795.2:c.746C>G	0.28		11	28		70	328	2020-06-17
Kidney Renal Papillary Cell Carcinoma (TCGA, PanCancer Atlas)	TCGA-B3-4104-01	Papillary Renal Cell Carcinoma	S249C	OncoKB: Oncogenic, level_3b;CIViC: Functional: 5, Predictive: 9, Diagnostic: 1;MyCancerGenome: not present;CancerHotspot: yes;3DHotspot: yes	MutationAssessor: impact: high, score: 3.885;SIFT: impact: deleterious, score: 0.01;Polyphen-2: impact: probably_damaging, score: 0.968	Missense_Mutation	SNP	diploid	1251	.	.	.	4	1803568	1803568	C	G	4:g.1803568C>G	ENST00000260795.2:c.746C>G	0.43		10	13		38	74	2020-06-17
Lung Squamous Cell Carcinoma (TCGA, PanCancer Atlas)	TCGA-56-7221-01	Lung Squamous Cell Carcinoma	S249C	OncoKB: Oncogenic, level_3b;CIViC: Functional: 5, Predictive: 9, Diagnostic: 1;MyCancerGenome: not present;CancerHotspot: yes;3DHotspot: yes	MutationAssessor: impact: high, score: 3.885;SIFT: impact: deleterious, score: 0.01;Polyphen-2: impact: probably_damaging, score: 0.968	Missense_Mutation	SNP	shallowdel	1251	.	.	.	4	1803568	1803568	C	G	4:g.1803568C>G	ENST00000260795.2:c.746C>G	0.46		12	14		32	246	2020-06-17
Lung Squamous Cell Carcinoma (TCGA, PanCancer Atlas)	TCGA-63-A5MI-01	Lung Squamous Cell Carcinoma	S249C	OncoKB: Oncogenic, level_3b;CIViC: Functional: 5, Predictive: 9, Diagnostic: 1;MyCancerGenome: not present;CancerHotspot: yes;3DHotspot: yes	MutationAssessor: impact: high, score: 3.885;SIFT: impact: deleterious, score: 0.01;Polyphen-2: impact: probably_damaging, score: 0.968	Missense_Mutation	SNP	diploid	1251	.	.	.	4	1803568	1803568	C	G	4:g.1803568C>G	ENST00000260795.2:c.746C>G	0.59		33	23		36	193	2020-06-17
Lung Squamous Cell Carcinoma (TCGA, PanCancer Atlas)	TCGA-66-2770-01	Lung Squamous Cell Carcinoma	S249C	OncoKB: Oncogenic, level_3b;CIViC: Functional: 5, Predictive: 9, Diagnostic: 1;MyCancerGenome: not present;CancerHotspot: yes;3DHotspot: yes	MutationAssessor: impact: high, score: 3.885;SIFT: impact: deleterious, score: 0.01;Polyphen-2: impact: probably_damaging, score: 0.968	Missense_Mutation	SNP	diploid	1251	.	.	.	4	1803568	1803568	C	G	4:g.1803568C>G	ENST00000260795.2:c.746C>G	0.16		3	16		19	205	2020-06-17
Lung Squamous Cell Carcinoma (TCGA, PanCancer Atlas)	TCGA-77-6844-01	Lung Squamous Cell Carcinoma	S249C	OncoKB: Oncogenic, level_3b;CIViC: Functional: 5, Predictive: 9, Diagnostic: 1;MyCancerGenome: not present;CancerHotspot: yes;3DHotspot: yes	MutationAssessor: impact: high, score: 3.885;SIFT: impact: deleterious, score: 0.01;Polyphen-2: impact: probably_damaging, score: 0.968	Missense_Mutation	SNP	diploid	1251	.	.	.	4	1803568	1803568	C	G	4:g.1803568C>G	ENST00000260795.2:c.746C>G	0.3		10	23		23	174	2020-06-17
Head and Neck Squamous Cell Carcinoma (TCGA, PanCancer Atlas)	TCGA-QK-A6V9-01	Head and Neck Squamous Cell Carcinoma	R248C	OncoKB: Oncogenic, level_3b;CIViC: Predictive: 6, Functional: 2;MyCancerGenome: not present;CancerHotspot: yes;3DHotspot: yes	MutationAssessor: impact: high, score: 4.055;SIFT: impact: deleterious, score: 0;Polyphen-2: impact: probably_damaging, score: 0.959	Missense_Mutation	SNP	gain	250	.	.	.	4	1803564	1803564	C	T	4:g.1803564C>T	ENST00000260795.2:c.742C>T	0.16		7	38		43	60	2020-06-17
Glioblastoma Multiforme (TCGA, PanCancer Atlas)	TCGA-06-0168-01	Glioblastoma Multiforme	K650E	OncoKB: Oncogenic, level_3b;CIViC: Predictive: 1;MyCancerGenome: not present;CancerHotspot: yes;3DHotspot: no	MutationAssessor: impact: low, score: 0.82;SIFT: impact: deleterious, score: 0;Polyphen-2: impact: probably_damaging, score: 0.999	Missense_Mutation	SNP	diploid	96	.	.	.	4	1807889	1807889	A	G	4:g.1807889A>G	ENST00000260795.2:c.1948A>G	0.24		8	26		35	36	13/17
Head and Neck Squamous Cell Carcinoma (TCGA, PanCancer Atlas)	TCGA-TN-A7HL-01	Head and Neck Squamous Cell Carcinoma	G380R	OncoKB: Likely Oncogenic, level_3b;CIViC: Predictive: 1;MyCancerGenome: not present;CancerHotspot: yes;3DHotspot: no	MutationAssessor: impact: low, score: 1.5;SIFT: impact: tolerated, score: 0.07;Polyphen-2: impact: benign, score: 0.255	Missense_Mutation	SNP	diploid	14	.	.	.	4	1806119	1806119	G	A	4:g.1806119G>A	ENST00000260795.2:c.1138G>A	0.21		45	169		89	546	2020-08-17
Stomach Adenocarcinoma (TCGA, PanCancer Atlas)	TCGA-FP-A4BE-01	Stomach Adenocarcinoma	G380R	OncoKB: Likely Oncogenic, level_3b;CIViC: Predictive: 1;MyCancerGenome: not present;CancerHotspot: yes;3DHotspot: no	MutationAssessor: impact: low, score: 1.5;SIFT: impact: tolerated, score: 0.07;Polyphen-2: impact: benign, score: 0.255	Missense_Mutation	SNP		14	.	.	.	4	1806119	1806119	G	A	4:g.1806119G>A	ENST00000260795.2:c.1138G>A	0.36		89	159		333	1336	2020-08-17
Kidney Renal Papillary Cell Carcinoma (TCGA, PanCancer Atlas)	TCGA-HE-7130-01	Papillary Renal Cell Carcinoma	Y373C	OncoKB: Oncogenic, level_3b;CIViC: Predictive: 3, Functional: 5;MyCancerGenome: not present;CancerHotspot: yes;3DHotspot: no	MutationAssessor: impact: medium, score: 2.43;SIFT: impact: deleterious, score: 0;Polyphen-2: impact: possibly_damaging, score: 0.896	Missense_Mutation	SNP	diploid	421	.	.	.	4	1806099	1806099	A	G	4:g.1806099A>G	ENST00000260795.2:c.1118A>G	0.85		146	25		268	351	2020-08-17
Kidney Renal Papillary Cell Carcinoma (TCGA, PanCancer Atlas)	TCGA-J7-A8I2-01	Papillary Renal Cell Carcinoma	Y373C	OncoKB: Oncogenic, level_3b;CIViC: Predictive: 3, Functional: 5;MyCancerGenome: not present;CancerHotspot: yes;3DHotspot: no	MutationAssessor: impact: medium, score: 2.43;SIFT: impact: deleterious, score: 0;Polyphen-2: impact: possibly_damaging, score: 0.896	Missense_Mutation	SNP	diploid	421	.	.	.	4	1806099	1806099	A	G	4:g.1806099A>G	ENST00000260795.2:c.1118A>G	0.44		22	28		40	51	2020-08-17
Lung Squamous Cell Carcinoma (TCGA, PanCancer Atlas)	TCGA-77-7465-01	Lung Squamous Cell Carcinoma	G380R	OncoKB: Likely Oncogenic, level_3b;CIViC: Predictive: 1;MyCancerGenome: not present;CancerHotspot: yes;3DHotspot: no	MutationAssessor: impact: low, score: 1.5;SIFT: impact: tolerated, score: 0.07;Polyphen-2: impact: benign, score: 0.255	Missense_Mutation	SNP	shallowdel	14	.	.	.	4	1806119	1806119	G	C	4:g.1806119G>C	ENST00000260795.2:c.1138G>C	0.55		91	74		303	347	2020-08-17
Cervical Squamous Cell Carcinoma (TCGA, PanCancer Atlas)	TCGA-DS-A3LQ-01	Cervical Squamous Cell Carcinoma	FGFR3-TACC3	OncoKB: Oncogenic, level_3b;CIViC: Predictive: 3;MyCancerGenome: not present;CancerHotspot: no;3DHotspot: no	MutationAssessor: NA;SIFT: NA;Polyphen-2: NA	Fusion	NA	diploid		NA	NA	WashU	NA	-1	-1	NA										35
Cervical Squamous Cell Carcinoma (TCGA, PanCancer Atlas)	TCGA-Q1-A73R-01	Endocervical Adenocarcinoma	FGFR3-TACC3	OncoKB: Oncogenic, level_3b;CIViC: Predictive: 3;MyCancerGenome: not present;CancerHotspot: no;3DHotspot: no	MutationAssessor: NA;SIFT: NA;Polyphen-2: NA	Fusion	NA	diploid		NA	NA	WashU	NA	-1	-1	NA										47
Cervical Squamous Cell Carcinoma (TCGA, PanCancer Atlas)	TCGA-VS-A9UD-01	Cervical Squamous Cell Carcinoma	FGFR3-TACC3	OncoKB: Oncogenic, level_3b;CIViC: Predictive: 3;MyCancerGenome: not present;CancerHotspot: no;3DHotspot: no	MutationAssessor: NA;SIFT: NA;Polyphen-2: NA	Fusion	NA	shallowdel		NA	NA	WashU	NA	-1	-1	NA										155
Cervical Squamous Cell Carcinoma (TCGA, PanCancer Atlas)	TCGA-WL-A834-01	Cervical Squamous Cell Carcinoma	FGFR3-TACC3	OncoKB: Oncogenic, level_3b;CIViC: Predictive: 3;MyCancerGenome: not present;CancerHotspot: no;3DHotspot: no	MutationAssessor: NA;SIFT: NA;Polyphen-2: NA	Fusion	NA	amp		NA	NA	WashU	NA	-1	-1	NA										88
Cervical Squamous Cell Carcinoma (TCGA, PanCancer Atlas)	TCGA-ZJ-AAXT-01	Cervical Squamous Cell Carcinoma	FGFR3-TACC3	OncoKB: Oncogenic, level_3b;CIViC: Predictive: 3;MyCancerGenome: not present;CancerHotspot: no;3DHotspot: no	MutationAssessor: NA;SIFT: NA;Polyphen-2: NA	Fusion	NA	diploid		NA	NA	WashU	NA	-1	-1	NA										145
Esophageal Adenocarcinoma (TCGA, PanCancer Atlas)	TCGA-LN-A5U5-01	Esophageal Squamous Cell Carcinoma	FGFR3-TACC3	OncoKB: Oncogenic, level_3b;CIViC: Predictive: 3;MyCancerGenome: not present;CancerHotspot: no;3DHotspot: no	MutationAssessor: NA;SIFT: NA;Polyphen-2: NA	Fusion	NA	gain		NA	NA	WashU	NA	-1	-1	NA										48
Esophageal Adenocarcinoma (TCGA, PanCancer Atlas)	TCGA-LN-A9FO-01	Esophageal Squamous Cell Carcinoma	FGFR3-TACC3	OncoKB: Oncogenic, level_3b;CIViC: Predictive: 3;MyCancerGenome: not present;CancerHotspot: no;3DHotspot: no	MutationAssessor: NA;SIFT: NA;Polyphen-2: NA	Fusion	NA	shallowdel		NA	NA	WashU	NA	-1	-1	NA										87
Glioblastoma Multiforme (TCGA, PanCancer Atlas)	TCGA-27-1835-01	Glioblastoma Multiforme	FGFR3-TACC3	OncoKB: Oncogenic, level_3b;CIViC: Predictive: 3;MyCancerGenome: not present;CancerHotspot: no;3DHotspot: no	MutationAssessor: NA;SIFT: NA;Polyphen-2: NA	Fusion	NA	amp		NA	NA	WashU	NA	-1	-1	NA										65
Head and Neck Squamous Cell Carcinoma (TCGA, PanCancer Atlas)	TCGA-CR-6473-01	Head and Neck Squamous Cell Carcinoma	FGFR3-TACC3	OncoKB: Oncogenic, level_3b;CIViC: Predictive: 3;MyCancerGenome: not present;CancerHotspot: no;3DHotspot: no	MutationAssessor: NA;SIFT: NA;Polyphen-2: NA	Fusion	NA	gain		NA	NA	WashU	NA	-1	-1	NA										87
Head and Neck Squamous Cell Carcinoma (TCGA, PanCancer Atlas)	TCGA-CV-7100-01	Head and Neck Squamous Cell Carcinoma	FGFR3-TACC3	OncoKB: Oncogenic, level_3b;CIViC: Predictive: 3;MyCancerGenome: not present;CancerHotspot: no;3DHotspot: no	MutationAssessor: NA;SIFT: NA;Polyphen-2: NA	Fusion	NA	diploid		NA	NA	WashU	NA	-1	-1	NA										33
Kidney Renal Papillary Cell Carcinoma (TCGA, PanCancer Atlas)	TCGA-A4-7287-01	Papillary Renal Cell Carcinoma	FGFR3-TACC3	OncoKB: Oncogenic, level_3b;CIViC: Predictive: 3;MyCancerGenome: not present;CancerHotspot: no;3DHotspot: no	MutationAssessor: NA;SIFT: NA;Polyphen-2: NA	Fusion	NA	shallowdel		NA	NA	WashU	NA	-1	-1	NA										40
Kidney Renal Papillary Cell Carcinoma (TCGA, PanCancer Atlas)	TCGA-DW-7839-01	Papillary Renal Cell Carcinoma	FGFR3-TACC3	OncoKB: Oncogenic, level_3b;CIViC: Predictive: 3;MyCancerGenome: not present;CancerHotspot: no;3DHotspot: no	MutationAssessor: NA;SIFT: NA;Polyphen-2: NA	Fusion	NA	diploid		NA	NA	WashU	NA	-1	-1	NA										42
Brain Lower Grade Glioma (TCGA, PanCancer Atlas)	TCGA-FG-7643-01	Oligoastrocytoma	FGFR3-TACC3	OncoKB: Oncogenic, level_3b;CIViC: Predictive: 3;MyCancerGenome: not present;CancerHotspot: no;3DHotspot: no	MutationAssessor: NA;SIFT: NA;Polyphen-2: NA	Fusion	NA	amp		NA	NA	WashU	NA	-1	-1	NA										47
Brain Lower Grade Glioma (TCGA, PanCancer Atlas)	TCGA-P5-A72U-01	Oligodendroglioma	FGFR3-TACC3	OncoKB: Oncogenic, level_3b;CIViC: Predictive: 3;MyCancerGenome: not present;CancerHotspot: no;3DHotspot: no	MutationAssessor: NA;SIFT: NA;Polyphen-2: NA	Fusion	NA	diploid		NA	NA	WashU	NA	-1	-1	NA										48
Liver Hepatocellular Carcinoma (TCGA, PanCancer Atlas)	TCGA-CC-A3M9-01	Hepatocellular Carcinoma	FGFR3-TACC3	OncoKB: Oncogenic, level_3b;CIViC: Predictive: 3;MyCancerGenome: not present;CancerHotspot: no;3DHotspot: no	MutationAssessor: NA;SIFT: NA;Polyphen-2: NA	Fusion	NA	gain		NA	NA	WashU	NA	-1	-1	NA										124
Liver Hepatocellular Carcinoma (TCGA, PanCancer Atlas)	TCGA-DD-A1EK-01	Hepatocellular Carcinoma	FGFR3-TACC3	OncoKB: Oncogenic, level_3b;CIViC: Predictive: 3;MyCancerGenome: not present;CancerHotspot: no;3DHotspot: no	MutationAssessor: NA;SIFT: NA;Polyphen-2: NA	Fusion	NA	diploid		NA	NA	WashU	NA	-1	-1	NA										63
Lung Squamous Cell Carcinoma (TCGA, PanCancer Atlas)	TCGA-22-4607-01	Lung Squamous Cell Carcinoma	FGFR3-TACC3	OncoKB: Oncogenic, level_3b;CIViC: Predictive: 3;MyCancerGenome: not present;CancerHotspot: no;3DHotspot: no	MutationAssessor: NA;SIFT: NA;Polyphen-2: NA	Fusion	NA	shallowdel		NA	NA	WashU	NA	-1	-1	NA										65
Lung Squamous Cell Carcinoma (TCGA, PanCancer Atlas)	TCGA-34-2608-01	Lung Squamous Cell Carcinoma	FGFR3-TACC3	OncoKB: Oncogenic, level_3b;CIViC: Predictive: 3;MyCancerGenome: not present;CancerHotspot: no;3DHotspot: no	MutationAssessor: NA;SIFT: NA;Polyphen-2: NA	Fusion	NA	diploid		NA	NA	WashU	NA	-1	-1	NA										130
Lung Squamous Cell Carcinoma (TCGA, PanCancer Atlas)	TCGA-39-5024-01	Lung Squamous Cell Carcinoma	FGFR3-TACC3	OncoKB: Oncogenic, level_3b;CIViC: Predictive: 3;MyCancerGenome: not present;CancerHotspot: no;3DHotspot: no	MutationAssessor: NA;SIFT: NA;Polyphen-2: NA	Fusion	NA	diploid		NA	NA	WashU	NA	-1	-1	NA										178
Lung Squamous Cell Carcinoma (TCGA, PanCancer Atlas)	TCGA-63-7022-01	Lung Squamous Cell Carcinoma	FGFR3-TACC3	OncoKB: Oncogenic, level_3b;CIViC: Predictive: 3;MyCancerGenome: not present;CancerHotspot: no;3DHotspot: no	MutationAssessor: NA;SIFT: NA;Polyphen-2: NA	Fusion	NA	diploid		NA	NA	WashU	NA	-1	-1	NA										165
Lung Squamous Cell Carcinoma (TCGA, PanCancer Atlas)	TCGA-66-2786-01	Lung Squamous Cell Carcinoma	FGFR3-TACC3	OncoKB: Oncogenic, level_3b;CIViC: Predictive: 3;MyCancerGenome: not present;CancerHotspot: no;3DHotspot: no	MutationAssessor: NA;SIFT: NA;Polyphen-2: NA	Fusion	NA	shallowdel		NA	NA	WashU	NA	-1	-1	NA										214
Lung Squamous Cell Carcinoma (TCGA, PanCancer Atlas)	TCGA-92-8065-01	Lung Squamous Cell Carcinoma	FGFR3-TACC3	OncoKB: Oncogenic, level_3b;CIViC: Predictive: 3;MyCancerGenome: not present;CancerHotspot: no;3DHotspot: no	MutationAssessor: NA;SIFT: NA;Polyphen-2: NA	Fusion	NA	shallowdel		NA	NA	WashU	NA	-1	-1	NA										235
Stomach Adenocarcinoma (TCGA, PanCancer Atlas)	TCGA-BR-8058-01	Stomach Adenocarcinoma	FGFR3-TACC3	OncoKB: Oncogenic, level_3b;CIViC: Predictive: 3;MyCancerGenome: not present;CancerHotspot: no;3DHotspot: no	MutationAssessor: NA;SIFT: NA;Polyphen-2: NA	Fusion	NA	shallowdel		NA	NA	WashU	NA	-1	-1	NA										46
Kidney Renal Papillary Cell Carcinoma (TCGA, PanCancer Atlas)	TCGA-HE-7130-01	Papillary Renal Cell Carcinoma	K650N	OncoKB: Likely Oncogenic, level_3b;CIViC: NA;MyCancerGenome: not present;CancerHotspot: yes;3DHotspot: no	MutationAssessor: impact: neutral, score: 0.615;SIFT: impact: deleterious, score: 0;Polyphen-2: impact: probably_damaging, score: 1	Missense_Mutation	SNP	diploid	96	.	.	.	4	1807891	1807891	G	C	4:g.1807891G>C	ENST00000260795.2:c.1950G>C	1		14			44	351	13/17
Cervical Squamous Cell Carcinoma (TCGA, PanCancer Atlas)	TCGA-WL-A834-01	Cervical Squamous Cell Carcinoma	TACC3-FGFR3	OncoKB: Oncogenic, level_3b;CIViC: NA;MyCancerGenome: not present;CancerHotspot: no;3DHotspot: no	MutationAssessor: NA;SIFT: NA;Polyphen-2: NA	Fusion	NA	amp		NA	NA	WashU	NA	-1	-1	NA										88
Glioblastoma Multiforme (TCGA, PanCancer Atlas)	TCGA-27-1835-01	Glioblastoma Multiforme	TACC3-FGFR3	OncoKB: Oncogenic, level_3b;CIViC: NA;MyCancerGenome: not present;CancerHotspot: no;3DHotspot: no	MutationAssessor: NA;SIFT: NA;Polyphen-2: NA	Fusion	NA	amp		NA	NA	WashU	NA	-1	-1	NA										65
Brain Lower Grade Glioma (TCGA, PanCancer Atlas)	TCGA-P5-A72U-01	Oligodendroglioma	TACC3-FGFR3	OncoKB: Oncogenic, level_3b;CIViC: NA;MyCancerGenome: not present;CancerHotspot: no;3DHotspot: no	MutationAssessor: NA;SIFT: NA;Polyphen-2: NA	Fusion	NA	diploid		NA	NA	WashU	NA	-1	-1	NA										48
Lung Squamous Cell Carcinoma (TCGA, PanCancer Atlas)	TCGA-66-2786-01	Lung Squamous Cell Carcinoma	TACC3-FGFR3	OncoKB: Oncogenic, level_3b;CIViC: NA;MyCancerGenome: not present;CancerHotspot: no;3DHotspot: no	MutationAssessor: NA;SIFT: NA;Polyphen-2: NA	Fusion	NA	shallowdel		NA	NA	WashU	NA	-1	-1	NA										214
Glioblastoma Multiforme (TCGA, PanCancer Atlas)	TCGA-19-A6J4-01	Glioblastoma Multiforme	FGFR3-AMBRA1	OncoKB: Likely Oncogenic, level_3b;CIViC: NA;MyCancerGenome: not present;CancerHotspot: no;3DHotspot: no	MutationAssessor: NA;SIFT: NA;Polyphen-2: NA	Fusion	NA	amp		NA	NA	WashU	NA	-1	-1	NA										24
Brain Lower Grade Glioma (TCGA, PanCancer Atlas)	TCGA-CS-6186-01	Oligoastrocytoma	FGFR3-ELAVL3	OncoKB: Likely Oncogenic, level_3b;CIViC: NA;MyCancerGenome: not present;CancerHotspot: no;3DHotspot: no	MutationAssessor: NA;SIFT: NA;Polyphen-2: NA	Fusion	NA	amp		NA	NA	WashU	NA	-1	-1	NA										50
Brain Lower Grade Glioma (TCGA, PanCancer Atlas)	TCGA-TM-A84B-01	Astrocytoma	FGFR3-FBXO28	OncoKB: Likely Oncogenic, level_3b;CIViC: NA;MyCancerGenome: not present;CancerHotspot: no;3DHotspot: no	MutationAssessor: NA;SIFT: NA;Polyphen-2: NA	Fusion	NA	amp		NA	NA	WashU	NA	-1	-1	NA										29
Ovarian Serous Cystadenocarcinoma (TCGA, PanCancer Atlas)	TCGA-24-1474-01	Serous Ovarian Cancer	FGFR3-MLLT10	OncoKB: Likely Oncogenic, level_3b;CIViC: NA;MyCancerGenome: not present;CancerHotspot: no;3DHotspot: no	MutationAssessor: NA;SIFT: NA;Polyphen-2: NA	Fusion	NA	amp		NA	NA	WashU	NA	-1	-1	NA										80
Prostate Adenocarcinoma (TCGA, PanCancer Atlas)	TCGA-EJ-A7NM-01	Prostate Adenocarcinoma	FGFR3-AES	OncoKB: Likely Oncogenic, level_3b;CIViC: NA;MyCancerGenome: not present;CancerHotspot: no;3DHotspot: no	MutationAssessor: NA;SIFT: NA;Polyphen-2: NA	Fusion	NA	amp		NA	NA	WashU	NA	-1	-1	NA										45
Skin Cutaneous Melanoma (TCGA, PanCancer Atlas)	TCGA-D9-A1X3-06	Cutaneous Melanoma	FAM193A-FGFR3	OncoKB: Likely Oncogenic, level_3b;CIViC: NA;MyCancerGenome: not present;CancerHotspot: no;3DHotspot: no	MutationAssessor: NA;SIFT: NA;Polyphen-2: NA	Fusion	NA	amp		NA	NA	WashU	NA	-1	-1	NA										413
Uterine Corpus Endometrial Carcinoma (TCGA, PanCancer Atlas)	TCGA-DI-A1BU-01	Uterine Mixed Endometrial Carcinoma	Y373H	OncoKB: Likely Oncogenic, level_4;CIViC: NA;MyCancerGenome: not present;CancerHotspot: yes;3DHotspot: no	MutationAssessor: impact: medium, score: 2.43;SIFT: impact: tolerated, score: 0.05;Polyphen-2: impact: possibly_damaging, score: 0.853	Missense_Mutation	SNP	diploid	421	.	.	.	4	1806098	1806098	T	C	4:g.1806098T>C	ENST00000260795.2:c.1117T>C	0.21		36	136		74	7642	2020-08-17
Head and Neck Squamous Cell Carcinoma (TCGA, PanCancer Atlas)	TCGA-CV-7568-01	Head and Neck Squamous Cell Carcinoma	P250S	OncoKB: Predicted Oncogenic, level_4;CIViC: NA;MyCancerGenome: not present;CancerHotspot: no;3DHotspot: yes	MutationAssessor: impact: low, score: 1.045;SIFT: impact: deleterious, score: 0.04;Polyphen-2: impact: benign, score: 0.259	Missense_Mutation	SNP			.	.	.	4	1803570	1803570	C	T	4:g.1803570C>T	ENST00000260795.2:c.748C>T	0.41		11	16		42	1921	2020-06-17
Colorectal Adenocarcinoma (TCGA, PanCancer Atlas)	TCGA-DM-A1D7-01	Colon Adenocarcinoma	R669Q	OncoKB: Likely Oncogenic, level_4;CIViC: NA;MyCancerGenome: not present;CancerHotspot: no;3DHotspot: no	MutationAssessor: impact: neutral, score: 0.15;SIFT: impact: deleterious, score: 0.01;Polyphen-2: impact: possibly_damaging, score: 0.558	Missense_Mutation	SNP	diploid	1	.	.	.	4	1808030	1808030	G	A	4:g.1808030G>A	ENST00000260795.2:c.2006G>A	0.36		10	18		36	126	14/17
Head and Neck Squamous Cell Carcinoma (TCGA, PanCancer Atlas)	TCGA-QK-A6V9-01	Head and Neck Squamous Cell Carcinoma	R669G	OncoKB: Likely Oncogenic, level_4;CIViC: NA;MyCancerGenome: not present;CancerHotspot: no;3DHotspot: no	MutationAssessor: impact: neutral, score: -0.075;SIFT: impact: deleterious, score: 0.01;Polyphen-2: impact: probably_damaging, score: 0.982	Missense_Mutation	SNP	gain	1	.	.	.	4	1808029	1808029	C	G	4:g.1808029C>G	ENST00000260795.2:c.2005C>G	0.39		27	42		83	60	14/17
Acute Myeloid Leukemia (TCGA, PanCancer Atlas)	TCGA-AB-2920-03	Acute Myeloid Leukemia	FGFR3-TACC3	OncoKB: Oncogenic, level NA;CIViC: Predictive: 3;MyCancerGenome: not present;CancerHotspot: no;3DHotspot: no	MutationAssessor: NA;SIFT: NA;Polyphen-2: NA	Fusion	NA	diploid		NA	NA	WashU	NA	-1	-1	NA										20
Uterine Corpus Endometrial Carcinoma (TCGA, PanCancer Atlas)	TCGA-E6-A2P9-01	Uterine Endometrioid Carcinoma	K403Qfs*93	OncoKB: Unknown, level NA;CIViC: NA;MyCancerGenome: not present;CancerHotspot: no;3DHotspot: no	MutationAssessor: NA;SIFT: NA;Polyphen-2: NA	Frame_Shift_Ins	INS	diploid		.	.	.	4	1806180	1806181	-	C	4:g.1806180_1806181insC	ENST00000260795.2:c.1206dup	0.4		39	58		79	864	2020-08-17
Glioblastoma Multiforme (TCGA, PanCancer Atlas)	TCGA-19-1790-01	Glioblastoma Multiforme	R603Q	OncoKB: Unknown, level NA;CIViC: NA;MyCancerGenome: not present;CancerHotspot: no;3DHotspot: no	MutationAssessor: impact: neutral, score: 0.64;SIFT: impact: deleterious, score: 0;Polyphen-2: impact: probably_damaging, score: 0.995	Missense_Mutation	SNP		2	.	.	.	4	1807639	1807639	G	A	4:g.1807639G>A	ENST00000260795.2:c.1808G>A	0.2	0.005	27	111	1	201	101	2020-12-17
Prostate Adenocarcinoma (TCGA, PanCancer Atlas)	TCGA-XK-AAIW-01	Prostate Adenocarcinoma	V630M	OncoKB: Likely Neutral, level NA;CIViC: NA;MyCancerGenome: not present;CancerHotspot: no;3DHotspot: no	MutationAssessor: impact: medium, score: 1.995;SIFT: impact: deleterious, score: 0;Polyphen-2: impact: probably_damaging, score: 0.984	Missense_Mutation	SNP	diploid	2	.	.	.	4	1807829	1807829	G	A	4:g.1807829G>A	ENST00000260795.2:c.1888G>A	0.41		12	17		43	6234	13/17
Bladder Urothelial Carcinoma (TCGA, PanCancer Atlas)	TCGA-FJ-A3ZF-01	Bladder Urothelial Carcinoma	V306I	OncoKB: Unknown, level NA;CIViC: NA;MyCancerGenome: not present;CancerHotspot: no;3DHotspot: no	MutationAssessor: impact: neutral, score: 0.155;SIFT: impact: tolerated, score: 0.09;Polyphen-2: impact: benign, score: 0.202	Missense_Mutation	SNP	shallowdel		.	.	.	4	1803738	1803738	G	A	4:g.1803738G>A	ENST00000260795.2:c.916G>A	0.31		5	11		28	228	2020-06-17
Stomach Adenocarcinoma (TCGA, PanCancer Atlas)	TCGA-BR-8360-01	Intestinal Type Stomach Adenocarcinoma	A265V	OncoKB: Unknown, level NA;CIViC: NA;MyCancerGenome: not present;CancerHotspot: no;3DHotspot: no	MutationAssessor: impact: neutral, score: -0.225;SIFT: impact: tolerated, score: 0.72;Polyphen-2: impact: benign, score: 0.014	Missense_Mutation	SNP	diploid	3	.	.	.	4	1803616	1803616	C	T	4:g.1803616C>T	ENST00000260795.2:c.794C>T	0.36		9	16		96	801	2020-06-17
Stomach Adenocarcinoma (TCGA, PanCancer Atlas)	TCGA-BR-8680-01	Tubular Stomach Adenocarcinoma	V329A	OncoKB: Unknown, level NA;CIViC: NA;MyCancerGenome: not present;CancerHotspot: no;3DHotspot: no	MutationAssessor: impact: neutral, score: 0.71;SIFT: impact: deleterious, score: 0;Polyphen-2: impact: probably_damaging, score: 0.996	Missense_Mutation	SNP	diploid	1	.	.	.	4	1805474	1805474	T	C	4:g.1805474T>C	ENST00000260795.2:c.986T>C	0.31		16	36		76	5414	2020-07-17
Stomach Adenocarcinoma (TCGA, PanCancer Atlas)	TCGA-CG-4444-01	Diffuse Type Stomach Adenocarcinoma	A569V	OncoKB: Unknown, level NA;CIViC: NA;MyCancerGenome: not present;CancerHotspot: no;3DHotspot: no	MutationAssessor: impact: low, score: 0.92;SIFT: impact: deleterious, score: 0.02;Polyphen-2: impact: benign, score: 0.387	Missense_Mutation	SNP	shallowdel	1	.	.	.	4	1807537	1807537	C	T	4:g.1807537C>T	ENST00000260795.2:c.1706C>T	0.15		14	82		151	151	2020-12-17
Uterine Corpus Endometrial Carcinoma (TCGA, PanCancer Atlas)	TCGA-EO-A22R-01	Uterine Endometrioid Carcinoma	A569V	OncoKB: Unknown, level NA;CIViC: NA;MyCancerGenome: not present;CancerHotspot: no;3DHotspot: no	MutationAssessor: impact: low, score: 0.92;SIFT: impact: deleterious, score: 0.02;Polyphen-2: impact: benign, score: 0.387	Missense_Mutation	SNP	diploid	1	.	.	.	4	1807537	1807537	C	T	4:g.1807537C>T	ENST00000260795.2:c.1706C>T	0.36		42	74		101	12771	2020-12-17
Stomach Adenocarcinoma (TCGA, PanCancer Atlas)	TCGA-HU-A4GQ-01	Tubular Stomach Adenocarcinoma	P573Rfs*53	OncoKB: Unknown, level NA;CIViC: NA;MyCancerGenome: not present;CancerHotspot: no;3DHotspot: no	MutationAssessor: NA;SIFT: NA;Polyphen-2: NA	Frame_Shift_Del	DEL	diploid		.	.	.	4	1807545	1807545	C	-	4:g.1807545del	ENST00000260795.2:c.1718del	0.26		33	95		111	1680	2020-12-17
Head and Neck Squamous Cell Carcinoma (TCGA, PanCancer Atlas)	TCGA-CV-5442-01	Head and Neck Squamous Cell Carcinoma	D762H	OncoKB: Unknown, level NA;CIViC: NA;MyCancerGenome: not present;CancerHotspot: no;3DHotspot: no	MutationAssessor: impact: medium, score: 2.865;SIFT: impact: deleterious, score: 0;Polyphen-2: impact: probably_damaging, score: 0.979	Missense_Mutation	SNP	diploid		.	.	.	4	1808852	1808852	G	C	4:g.1808852G>C	ENST00000260795.2:c.2284G>C	0.25		3	9		11	223	17/17
Head and Neck Squamous Cell Carcinoma (TCGA, PanCancer Atlas)	TCGA-CV-5442-01	Head and Neck Squamous Cell Carcinoma	D786N	OncoKB: Unknown, level NA;CIViC: NA;MyCancerGenome: not present;CancerHotspot: no;3DHotspot: no	MutationAssessor: impact: medium, score: 2.78;SIFT: impact: deleterious, score: 0;Polyphen-2: impact: probably_damaging, score: 0.97	Missense_Mutation	SNP	diploid		.	.	.	4	1808924	1808924	G	A	4:g.1808924G>A	ENST00000260795.2:c.2356G>A	0.59		10	7		28	223	17/17
Head and Neck Squamous Cell Carcinoma (TCGA, PanCancer Atlas)	TCGA-CV-6941-01	Head and Neck Squamous Cell Carcinoma	V50I	OncoKB: Unknown, level NA;CIViC: NA;MyCancerGenome: not present;CancerHotspot: no;3DHotspot: no	MutationAssessor: impact: low, score: 1.865;SIFT: impact: tolerated, score: 0.23;Polyphen-2: impact: benign, score: 0.005	Missense_Mutation	SNP	shallowdel		.	.	.	4	1801019	1801019	G	A	4:g.1801019G>A	ENST00000260795.2:c.148G>A	0.2		17	67		123	147	2020-02-17
Head and Neck Squamous Cell Carcinoma (TCGA, PanCancer Atlas)	TCGA-CX-7085-01	Head and Neck Squamous Cell Carcinoma	S131L	OncoKB: Unknown, level NA;CIViC: NA;MyCancerGenome: not present;CancerHotspot: no;3DHotspot: no	MutationAssessor: impact: medium, score: 2.485;SIFT: impact: deleterious, score: 0.02;Polyphen-2: impact: probably_damaging, score: 0.954	Missense_Mutation	SNP	diploid		.	.	.	4	1801486	1801486	C	T	4:g.1801486C>T	ENST00000260795.2:c.392C>T	0.1		5	45		84	129	2020-03-17
Lung Adenocarcinoma (TCGA, PanCancer Atlas)	TCGA-53-7813-01	Lung Adenocarcinoma	S779R	OncoKB: Unknown, level NA;CIViC: NA;MyCancerGenome: not present;CancerHotspot: no;3DHotspot: no	MutationAssessor: impact: medium, score: 2.625;SIFT: impact: deleterious, score: 0;Polyphen-2: impact: probably_damaging, score: 0.991	Missense_Mutation	SNP	gain	1	.	.	.	4	1808905	1808905	C	G	4:g.1808905C>G	ENST00000260795.2:c.2337C>G	0.13		2	13		11	149	17/17
Uterine Corpus Endometrial Carcinoma (TCGA, PanCancer Atlas)	TCGA-B5-A11E-01	Uterine Endometrioid Carcinoma	R421Q	OncoKB: Unknown, level NA;CIViC: NA;MyCancerGenome: not present;CancerHotspot: no;3DHotspot: no	MutationAssessor: impact: medium, score: 2.61;SIFT: impact: deleterious, score: 0.01;Polyphen-2: impact: probably_damaging, score: 0.989	Missense_Mutation	SNP	diploid	1	.	.	.	4	1806243	1806243	G	A	4:g.1806243G>A	ENST00000260795.2:c.1262G>A	0.44		14	18		30	9039	2020-08-17
Uterine Corpus Endometrial Carcinoma (TCGA, PanCancer Atlas)	TCGA-BS-A0UF-01	Uterine Endometrioid Carcinoma	E456K	OncoKB: Unknown, level NA;CIViC: NA;MyCancerGenome: not present;CancerHotspot: no;3DHotspot: no	MutationAssessor: impact: medium, score: 2.52;SIFT: impact: deleterious, score: 0;Polyphen-2: impact: possibly_damaging, score: 0.776	Missense_Mutation	SNP	diploid	1	.	.	.	4	1806650	1806650	G	A	4:g.1806650G>A	ENST00000260795.2:c.1366G>A	0.31		11	25		29	8376	2020-09-17
Uterine Corpus Endometrial Carcinoma (TCGA, PanCancer Atlas)	TCGA-BS-A0UV-01	Uterine Endometrioid Carcinoma	L385M	OncoKB: Unknown, level NA;CIViC: NA;MyCancerGenome: not present;CancerHotspot: no;3DHotspot: no	MutationAssessor: impact: medium, score: 2.305;SIFT: impact: deleterious, score: 0.02;Polyphen-2: impact: possibly_damaging, score: 0.77	Missense_Mutation	SNP	diploid	1	.	.	.	4	1806134	1806134	C	A	4:g.1806134C>A	ENST00000260795.2:c.1153C>A	0.29		37	89		150	8968	2020-08-17
Bladder Urothelial Carcinoma (TCGA, PanCancer Atlas)	TCGA-DK-A3IS-01	Bladder Urothelial Carcinoma	E216K	OncoKB: Unknown, level NA;CIViC: NA;MyCancerGenome: not present;CancerHotspot: no;3DHotspot: no	MutationAssessor: impact: neutral, score: -0.3;SIFT: impact: deleterious, score: 0.01;Polyphen-2: impact: probably_damaging, score: 0.981	Missense_Mutation	SNP	amp	1	.	.	.	4	1803377	1803377	G	A	4:g.1803377G>A	ENST00000260795.2:c.646G>A	0.06		20	335		80	308	2020-05-17
Bladder Urothelial Carcinoma (TCGA, PanCancer Atlas)	TCGA-DK-A3IS-01	Bladder Urothelial Carcinoma	D222N	OncoKB: Unknown, level NA;CIViC: NA;MyCancerGenome: not present;CancerHotspot: no;3DHotspot: no	MutationAssessor: impact: medium, score: 3.05;SIFT: impact: deleterious, score: 0;Polyphen-2: impact: probably_damaging, score: 0.994	Missense_Mutation	SNP	amp	1	.	.	.	4	1803395	1803395	G	A	4:g.1803395G>A	ENST00000260795.2:c.664G>A	0.05		20	349		90	308	2020-05-17
Bladder Urothelial Carcinoma (TCGA, PanCancer Atlas)	TCGA-DK-A3IS-01	Bladder Urothelial Carcinoma	G235D	OncoKB: Unknown, level NA;CIViC: NA;MyCancerGenome: not present;CancerHotspot: no;3DHotspot: no	MutationAssessor: impact: medium, score: 2.41;SIFT: impact: deleterious, score: 0.01;Polyphen-2: impact: probably_damaging, score: 0.998	Missense_Mutation	SNP	amp	1	.	.	.	4	1803435	1803435	G	A	4:g.1803435G>A	ENST00000260795.2:c.704G>A	0.03		10	314		64	308	2020-05-17
Bladder Urothelial Carcinoma (TCGA, PanCancer Atlas)	TCGA-DK-A3IS-01	Bladder Urothelial Carcinoma	H791Tfs*29	OncoKB: Unknown, level NA;CIViC: NA;MyCancerGenome: not present;CancerHotspot: no;3DHotspot: no	MutationAssessor: NA;SIFT: NA;Polyphen-2: NA	Frame_Shift_Del	DEL	amp		.	.	.	4	1808937	1808937	C	-	4:g.1808937del	ENST00000260795.2:c.2371del	0.51		237	226		43	308	17/17
Bladder Urothelial Carcinoma (TCGA, PanCancer Atlas)	TCGA-GU-A42R-01	Bladder Urothelial Carcinoma	H349Y	OncoKB: Unknown, level NA;CIViC: NA;MyCancerGenome: not present;CancerHotspot: no;3DHotspot: no	MutationAssessor: impact: neutral, score: 0.155;SIFT: impact: tolerated, score: 0.75;Polyphen-2: impact: benign, score: 0.007	Missense_Mutation	SNP	gain	1	.	.	.	4	1805533	1805533	C	T	4:g.1805533C>T	ENST00000260795.2:c.1045C>T	0.75		104	34		105	131	2020-07-17
Kidney Renal Clear Cell Carcinoma (TCGA, PanCancer Atlas)	TCGA-CJ-4908-01	Renal Clear Cell Carcinoma	G637W	OncoKB: Likely Neutral, level NA;CIViC: NA;MyCancerGenome: not present;CancerHotspot: no;3DHotspot: no	MutationAssessor: impact: high, score: 4.465;SIFT: impact: deleterious, score: 0;Polyphen-2: impact: probably_damaging, score: 1	Missense_Mutation	SNP	diploid	1	.	.	.	4	1807850	1807850	G	T	4:g.1807850G>T	ENST00000260795.2:c.1909G>T	0.23		7	24		39	28	13/17
Lung Squamous Cell Carcinoma (TCGA, PanCancer Atlas)	TCGA-51-4079-01	Lung Squamous Cell Carcinoma	K715M	OncoKB: Unknown, level NA;CIViC: NA;MyCancerGenome: not present;CancerHotspot: no;3DHotspot: no	MutationAssessor: impact: low, score: 1.575;SIFT: impact: deleterious, score: 0;Polyphen-2: impact: probably_damaging, score: 0.992	Missense_Mutation	SNP	diploid	1	.	.	.	4	1808386	1808386	A	T	4:g.1808386A>T	ENST00000260795.2:c.2144A>T	0.24		14	44		65	364	15/17
Lung Adenocarcinoma (TCGA, PanCancer Atlas)	TCGA-05-4417-01	Lung Adenocarcinoma	V271M	OncoKB: Unknown, level NA;CIViC: NA;MyCancerGenome: not present;CancerHotspot: no;3DHotspot: no	MutationAssessor: impact: medium, score: 2.235;SIFT: impact: deleterious, score: 0;Polyphen-2: impact: probably_damaging, score: 0.973	Missense_Mutation	SNP	shallowdel		.	.	.	4	1803633	1803633	G	A	4:g.1803633G>A	ENST00000260795.2:c.811G>A	0.33		11	22		34	283	2020-06-17
Lung Squamous Cell Carcinoma (TCGA, PanCancer Atlas)	TCGA-52-7622-01	Lung Squamous Cell Carcinoma	A334D	OncoKB: Unknown, level NA;CIViC: NA;MyCancerGenome: not present;CancerHotspot: no;3DHotspot: no	MutationAssessor: impact: low, score: 1.89;SIFT: impact: deleterious, score: 0;Polyphen-2: impact: possibly_damaging, score: 0.794	Missense_Mutation	SNP	diploid		.	.	.	4	1805489	1805489	C	A	4:g.1805489C>A	ENST00000260795.2:c.1001C>A	0.16		6	31		59	239	2020-07-17
Lung Squamous Cell Carcinoma (TCGA, PanCancer Atlas)	TCGA-68-8250-01	Lung Squamous Cell Carcinoma	Q45R	OncoKB: Unknown, level NA;CIViC: NA;MyCancerGenome: not present;CancerHotspot: no;3DHotspot: no	MutationAssessor: impact: low, score: 1.445;SIFT: impact: tolerated, score: 0.08;Polyphen-2: impact: benign, score: 0.184	Missense_Mutation	SNP	gain		.	.	.	4	1801005	1801005	A	G	4:g.1801005A>G	ENST00000260795.2:c.134A>G	0.14		29	177		232	277	2020-02-17
Lung Adenocarcinoma (TCGA, PanCancer Atlas)	TCGA-NJ-A4YP-01	Lung Adenocarcinoma	S693C	OncoKB: Unknown, level NA;CIViC: NA;MyCancerGenome: not present;CancerHotspot: no;3DHotspot: no	MutationAssessor: impact: low, score: 1.805;SIFT: impact: deleterious, score: 0;Polyphen-2: impact: probably_damaging, score: 0.978	Missense_Mutation	SNP	diploid		.	.	.	4	1808320	1808320	C	G	4:g.1808320C>G	ENST00000260795.2:c.2078C>G	0.16		7	38		44	468	15/17
Stomach Adenocarcinoma (TCGA, PanCancer Atlas)	TCGA-3M-AB46-01	Stomach Adenocarcinoma	L752F	OncoKB: Unknown, level NA;CIViC: NA;MyCancerGenome: not present;CancerHotspot: no;3DHotspot: no	MutationAssessor: impact: low, score: 1.895;SIFT: impact: deleterious, score: 0;Polyphen-2: impact: probably_damaging, score: 0.982	Missense_Mutation	SNP	shallowdel		.	.	.	4	1808641	1808641	C	T	4:g.1808641C>T	ENST00000260795.2:c.2254C>T	0.38		5	8		13	167	16/17
Skin Cutaneous Melanoma (TCGA, PanCancer Atlas)	TCGA-EE-A29M-06	Cutaneous Melanoma	P62L	OncoKB: Unknown, level NA;CIViC: NA;MyCancerGenome: not present;CancerHotspot: no;3DHotspot: no	MutationAssessor: impact: low, score: 1.69;SIFT: impact: tolerated, score: 0.35;Polyphen-2: impact: benign, score: 0.001	Missense_Mutation	SNP	shallowdel	1	.	.	.	4	1801056	1801056	C	T	4:g.1801056C>T	ENST00000260795.2:c.185C>T	0.2		31	121		81	1965	2020-02-17
Esophageal Adenocarcinoma (TCGA, PanCancer Atlas)	TCGA-LN-A49N-01	Esophageal Squamous Cell Carcinoma	E490D	OncoKB: Unknown, level NA;CIViC: NA;MyCancerGenome: not present;CancerHotspot: no;3DHotspot: no	MutationAssessor: impact: low, score: 1.675;SIFT: impact: tolerated, score: 0.07;Polyphen-2: impact: benign, score: 0.046	Missense_Mutation	SNP	shallowdel	1	.	.	.	4	1807139	1807139	G	T	4:g.1807139G>T	ENST00000260795.2:c.1470G>T	0.16		4	21		33	49	2020-10-17
Prostate Adenocarcinoma (TCGA, PanCancer Atlas)	TCGA-J9-A52C-01	Prostate Adenocarcinoma	A312V	OncoKB: Unknown, level NA;CIViC: NA;MyCancerGenome: not present;CancerHotspot: no;3DHotspot: no	MutationAssessor: impact: low, score: 0.945;SIFT: impact: deleterious, score: 0.02;Polyphen-2: impact: benign, score: 0.44	Missense_Mutation	SNP	diploid		.	.	.	4	1805423	1805423	C	T	4:g.1805423C>T	ENST00000260795.2:c.935C>T	0.17		5	25		38	489	2020-07-17
Stomach Adenocarcinoma (TCGA, PanCancer Atlas)	TCGA-MX-A5UJ-01	Tubular Stomach Adenocarcinoma	D580N	OncoKB: Unknown, level NA;CIViC: NA;MyCancerGenome: not present;CancerHotspot: no;3DHotspot: no	MutationAssessor: impact: low, score: 1.02;SIFT: impact: tolerated, score: 0.32;Polyphen-2: impact: benign, score: 0.055	Missense_Mutation	SNP	diploid		.	.	.	4	1807569	1807569	G	A	4:g.1807569G>A	ENST00000260795.2:c.1738G>A	0.2		40	158		185	1294	2020-12-17
Uterine Corpus Endometrial Carcinoma (TCGA, PanCancer Atlas)	TCGA-AJ-A3EL-01	Uterine Endometrioid Carcinoma	D580N	OncoKB: Unknown, level NA;CIViC: NA;MyCancerGenome: not present;CancerHotspot: no;3DHotspot: no	MutationAssessor: impact: low, score: 1.02;SIFT: impact: tolerated, score: 0.32;Polyphen-2: impact: benign, score: 0.055	Missense_Mutation	SNP	diploid		.	.	.	4	1807569	1807569	G	A	4:g.1807569G>A	ENST00000260795.2:c.1738G>A	0.38		15	25		132	7385	2020-12-17
Uterine Corpus Endometrial Carcinoma (TCGA, PanCancer Atlas)	TCGA-AP-A1DV-01	Uterine Endometrioid Carcinoma	D580N	OncoKB: Unknown, level NA;CIViC: NA;MyCancerGenome: not present;CancerHotspot: no;3DHotspot: no	MutationAssessor: impact: low, score: 1.02;SIFT: impact: tolerated, score: 0.32;Polyphen-2: impact: benign, score: 0.055	Missense_Mutation	SNP	diploid		.	.	.	4	1807569	1807569	G	A	4:g.1807569G>A	ENST00000260795.2:c.1738G>A	0.37		21	36		49	12063	2020-12-17
Sarcoma (TCGA, PanCancer Atlas)	TCGA-QQ-A8VG-01	Malignant Peripheral Nerve Sheath Tumor	S415F	OncoKB: Unknown, level NA;CIViC: NA;MyCancerGenome: not present;CancerHotspot: no;3DHotspot: no	MutationAssessor: impact: medium, score: 2.25;SIFT: impact: deleterious, score: 0;Polyphen-2: impact: possibly_damaging, score: 0.905	Missense_Mutation	SNP	diploid		.	.	.	4	1806225	1806225	C	T	4:g.1806225C>T	ENST00000260795.2:c.1244C>T	0.14		12	71		70	348	2020-08-17
Colorectal Adenocarcinoma (TCGA, PanCancer Atlas)	TCGA-CK-4951-01	Mucinous Adenocarcinoma of the Colon and Rectum	R399C	OncoKB: Unknown, level NA;CIViC: NA;MyCancerGenome: not present;CancerHotspot: no;3DHotspot: no	MutationAssessor: impact: low, score: 1.2;SIFT: impact: tolerated, score: 0.07;Polyphen-2: impact: benign, score: 0.009	Missense_Mutation	SNP	diploid	2	.	.	.	4	1806176	1806176	C	T	4:g.1806176C>T	ENST00000260795.2:c.1195C>T	0.38		15	25		44	4191	2020-08-17
Colorectal Adenocarcinoma (TCGA, PanCancer Atlas)	TCGA-AA-A01R-01	Mucinous Adenocarcinoma of the Colon and Rectum	V677I	OncoKB: Likely Neutral, level NA;CIViC: NA;MyCancerGenome: not present;CancerHotspot: no;3DHotspot: no	MutationAssessor: impact: low, score: 0.825;SIFT: impact: deleterious, score: 0.01;Polyphen-2: impact: probably_damaging, score: 0.927	Missense_Mutation	SNP	diploid	1	.	.	.	4	1808053	1808053	G	A	4:g.1808053G>A	ENST00000260795.2:c.2029G>A	0.34		21	41		103	1621	14/17
Ovarian Serous Cystadenocarcinoma (TCGA, PanCancer Atlas)	TCGA-31-1959-01	Serous Ovarian Cancer	C582F	OncoKB: Likely Neutral, level NA;CIViC: NA;MyCancerGenome: not present;CancerHotspot: no;3DHotspot: no	MutationAssessor: impact: neutral, score: 0.635;SIFT: impact: tolerated, score: 0.15;Polyphen-2: impact: benign, score: 0.021	Missense_Mutation	SNP	shallowdel	1	.	.	.	4	1807576	1807576	G	T	4:g.1807576G>T	ENST00000260795.2:c.1745G>T	0.52		15	14		43	67	2020-12-17
Breast Invasive Carcinoma (TCGA, PanCancer Atlas)	TCGA-A7-A5ZV-01	Breast Invasive Carcinoma (NOS)	D318N	OncoKB: Unknown, level NA;CIViC: NA;MyCancerGenome: not present;CancerHotspot: no;3DHotspot: no	MutationAssessor: impact: low, score: 0.805;SIFT: impact: tolerated, score: 0.21;Polyphen-2: impact: benign, score: 0.081	Missense_Mutation	SNP	shallowdel	1	.	.	.	4	1805440	1805440	G	A	4:g.1805440G>A	ENST00000260795.2:c.952G>A	0.58		35	25		158	161	2020-07-17
Pancreatic Adenocarcinoma (TCGA, PanCancer Atlas)	TCGA-IB-7651-01	Pancreatic Adenocarcinoma	D318N	OncoKB: Unknown, level NA;CIViC: NA;MyCancerGenome: not present;CancerHotspot: no;3DHotspot: no	MutationAssessor: impact: low, score: 0.805;SIFT: impact: tolerated, score: 0.21;Polyphen-2: impact: benign, score: 0.081	Missense_Mutation	SNP	diploid	1	.	.	.	4	1805440	1805440	G	A	4:g.1805440G>A	ENST00000260795.2:c.952G>A	0.17		39	189		52	14306	2020-07-17
Uterine Corpus Endometrial Carcinoma (TCGA, PanCancer Atlas)	TCGA-B5-A3FC-01	Uterine Endometrioid Carcinoma	R621H	OncoKB: Unknown, level NA;CIViC: NA;MyCancerGenome: not present;CancerHotspot: no;3DHotspot: no	MutationAssessor: impact: medium, score: 2.27;SIFT: impact: deleterious, score: 0;Polyphen-2: impact: probably_damaging, score: 1	Missense_Mutation	SNP	diploid	2	.	.	.	4	1807803	1807803	G	A	4:g.1807803G>A	ENST00000260795.2:c.1862G>A	0.49		31	32		103	12211	13/17
Uterine Corpus Endometrial Carcinoma (TCGA, PanCancer Atlas)	TCGA-BG-A222-01	Uterine Endometrioid Carcinoma	R640W	OncoKB: Unknown, level NA;CIViC: NA;MyCancerGenome: not present;CancerHotspot: no;3DHotspot: no	MutationAssessor: impact: high, score: 3.53;SIFT: impact: deleterious, score: 0;Polyphen-2: impact: probably_damaging, score: 1	Missense_Mutation	SNP	diploid	1	.	.	.	4	1807859	1807859	C	T	4:g.1807859C>T	ENST00000260795.2:c.1918C>T	0.38		20	33		54	4274	13/17
Liver Hepatocellular Carcinoma (TCGA, PanCancer Atlas)	TCGA-MI-A75E-01	Hepatocellular Carcinoma	R200C	OncoKB: Unknown, level NA;CIViC: NA;MyCancerGenome: not present;CancerHotspot: no;3DHotspot: no	MutationAssessor: impact: high, score: 3.855;SIFT: impact: deleterious, score: 0;Polyphen-2: impact: probably_damaging, score: 1	Missense_Mutation	SNP	diploid	1	.	.	.	4	1803246	1803246	C	T	4:g.1803246C>T	ENST00000260795.2:c.598C>T	0.22		9	32		43	117	2020-04-17
Colorectal Adenocarcinoma (TCGA, PanCancer Atlas)	TCGA-CA-6717-01	Mucinous Adenocarcinoma of the Colon and Rectum	D722N	OncoKB: Unknown, level NA;CIViC: NA;MyCancerGenome: not present;CancerHotspot: no;3DHotspot: no	MutationAssessor: impact: low, score: 1.095;SIFT: impact: deleterious, score: 0;Polyphen-2: impact: possibly_damaging, score: 0.679	Missense_Mutation	SNP	diploid		.	.	.	4	1808406	1808406	G	A	4:g.1808406G>A	ENST00000260795.2:c.2164G>A	0.18		6	27		32	9586	15/17
Uterine Corpus Endometrial Carcinoma (TCGA, PanCancer Atlas)	TCGA-SL-A6JA-01	Uterine Endometrioid Carcinoma	D722N	OncoKB: Unknown, level NA;CIViC: NA;MyCancerGenome: not present;CancerHotspot: no;3DHotspot: no	MutationAssessor: impact: low, score: 1.095;SIFT: impact: deleterious, score: 0;Polyphen-2: impact: possibly_damaging, score: 0.679	Missense_Mutation	SNP	diploid		.	.	.	4	1808406	1808406	G	A	4:g.1808406G>A	ENST00000260795.2:c.2164G>A	0.52		14	13		49	746	15/17
Bladder Urothelial Carcinoma (TCGA, PanCancer Atlas)	TCGA-CU-A72E-01	Bladder Urothelial Carcinoma	S351F	OncoKB: Unknown, level NA;CIViC: NA;MyCancerGenome: not present;CancerHotspot: no;3DHotspot: no	MutationAssessor: impact: medium, score: 2.315;SIFT: impact: deleterious, score: 0;Polyphen-2: impact: possibly_damaging, score: 0.756	Missense_Mutation	SNP	diploid		.	.	.	4	1805540	1805540	C	T	4:g.1805540C>T	ENST00000260795.2:c.1052C>T	0.77		47	14		88	91	2020-07-17
Bladder Urothelial Carcinoma (TCGA, PanCancer Atlas)	TCGA-UY-A78N-01	Bladder Urothelial Carcinoma	P358L	OncoKB: Unknown, level NA;CIViC: NA;MyCancerGenome: not present;CancerHotspot: no;3DHotspot: no	MutationAssessor: impact: medium, score: 2.75;SIFT: impact: deleterious, score: 0.01;Polyphen-2: impact: benign, score: 0.13	Missense_Mutation	SNP	gain		.	.	.	4	1805561	1805561	C	T	4:g.1805561C>T	ENST00000260795.2:c.1073C>T	0.41		24	34		36	266	2020-07-17
Skin Cutaneous Melanoma (TCGA, PanCancer Atlas)	TCGA-D9-A1X3-06	Cutaneous Melanoma	H274Y	OncoKB: Unknown, level NA;CIViC: NA;MyCancerGenome: not present;CancerHotspot: no;3DHotspot: no	MutationAssessor: impact: low, score: 0.815;SIFT: impact: tolerated, score: 1;Polyphen-2: impact: benign, score: 0.425	Missense_Mutation	SNP	amp	1	.	.	.	4	1803642	1803642	C	T	4:g.1803642C>T	ENST00000260795.2:c.820C>T	0.45		150	185		37	413	2020-06-17
Skin Cutaneous Melanoma (TCGA, PanCancer Atlas)	TCGA-FW-A3R5-06	Cutaneous Melanoma	E135K	OncoKB: Unknown, level NA;CIViC: NA;MyCancerGenome: not present;CancerHotspot: no;3DHotspot: no	MutationAssessor: impact: medium, score: 2.39;SIFT: impact: tolerated, score: 0.06;Polyphen-2: impact: probably_damaging, score: 0.95	Missense_Mutation	SNP	diploid	1	.	.	.	4	1801497	1801497	G	A	4:g.1801497G>A	ENST00000260795.2:c.403G>A	0.1		5	46		42	15825	2020-03-17
Skin Cutaneous Melanoma (TCGA, PanCancer Atlas)	TCGA-D3-A3C7-06	Cutaneous Melanoma	P63S	OncoKB: Unknown, level NA;CIViC: NA;MyCancerGenome: not present;CancerHotspot: no;3DHotspot: no	MutationAssessor: impact: neutral, score: 0.495;SIFT: impact: tolerated, score: 0.13;Polyphen-2: impact: benign, score: 0.009	Missense_Mutation	SNP	gain	1	.	.	.	4	1801058	1801058	C	T	4:g.1801058C>T	ENST00000260795.2:c.187C>T	0.6		57	38		62	1444	2020-02-17
Bladder Urothelial Carcinoma (TCGA, PanCancer Atlas)	TCGA-XF-A9SJ-01	Bladder Urothelial Carcinoma	L88Wfs*10	OncoKB: Unknown, level NA;CIViC: NA;MyCancerGenome: not present;CancerHotspot: no;3DHotspot: no	MutationAssessor: NA;SIFT: NA;Polyphen-2: NA	Frame_Shift_Del	DEL	shallowdel		.	.	.	4	1801132	1801132	C	-	4:g.1801132del	ENST00000260795.2:c.262del	0.17		5	24		27	261	2020-02-17
Colorectal Adenocarcinoma (TCGA, PanCancer Atlas)	TCGA-D5-6540-01	Mucinous Adenocarcinoma of the Colon and Rectum	G180D	OncoKB: Unknown, level NA;CIViC: NA;MyCancerGenome: not present;CancerHotspot: no;3DHotspot: no	MutationAssessor: impact: high, score: 4.41;SIFT: impact: deleterious, score: 0.01;Polyphen-2: impact: probably_damaging, score: 0.997	Missense_Mutation	SNP	diploid	1	.	.	.	4	1803187	1803187	G	A	4:g.1803187G>A	ENST00000260795.2:c.539G>A	0.27		16	43		28	1191	2020-04-17
Uterine Corpus Endometrial Carcinoma (TCGA, PanCancer Atlas)	TCGA-AX-A2HD-01	Uterine Endometrioid Carcinoma	G180D	OncoKB: Unknown, level NA;CIViC: NA;MyCancerGenome: not present;CancerHotspot: no;3DHotspot: no	MutationAssessor: impact: high, score: 4.41;SIFT: impact: deleterious, score: 0.01;Polyphen-2: impact: probably_damaging, score: 0.997	Missense_Mutation	SNP	diploid	1	.	.	.	4	1803187	1803187	G	A	4:g.1803187G>A	ENST00000260795.2:c.539G>A	0.45		9	11		22	7848	2020-04-17
Bladder Urothelial Carcinoma (TCGA, PanCancer Atlas)	TCGA-4Z-AA81-01	Bladder Urothelial Carcinoma	Q674*	OncoKB: Unknown, level NA;CIViC: NA;MyCancerGenome: not present;CancerHotspot: no;3DHotspot: no	MutationAssessor: NA;SIFT: NA;Polyphen-2: NA	Nonsense_Mutation	SNP	diploid		.	.	.	4	1808044	1808044	C	T	4:g.1808044C>T	ENST00000260795.2:c.2020C>T	0.22		8	28		49	195	14/17
Bladder Urothelial Carcinoma (TCGA, PanCancer Atlas)	TCGA-GU-AATQ-01	Bladder Urothelial Carcinoma	S351C	OncoKB: Unknown, level NA;CIViC: NA;MyCancerGenome: not present;CancerHotspot: no;3DHotspot: no	MutationAssessor: impact: medium, score: 2.72;SIFT: impact: deleterious, score: 0;Polyphen-2: impact: probably_damaging, score: 0.918	Missense_Mutation	SNP	diploid		.	.	.	4	1805540	1805540	C	G	4:g.1805540C>G	ENST00000260795.2:c.1052C>G	0.5		27	27		97	148	2020-07-17
Bladder Urothelial Carcinoma (TCGA, PanCancer Atlas)	TCGA-XF-A8HE-01	Bladder Urothelial Carcinoma	S348F	OncoKB: Unknown, level NA;CIViC: NA;MyCancerGenome: not present;CancerHotspot: no;3DHotspot: no	MutationAssessor: impact: low, score: 1.835;SIFT: impact: deleterious, score: 0;Polyphen-2: impact: possibly_damaging, score: 0.857	Missense_Mutation	SNP	diploid		.	.	.	4	1805531	1805531	C	T	4:g.1805531C>T	ENST00000260795.2:c.1043C>T	0.16		10	54		45	378	2020-07-17
Bladder Urothelial Carcinoma (TCGA, PanCancer Atlas)	TCGA-XF-A9SL-01	Bladder Urothelial Carcinoma	H349D	OncoKB: Unknown, level NA;CIViC: NA;MyCancerGenome: not present;CancerHotspot: no;3DHotspot: no	MutationAssessor: impact: neutral, score: 0.08;SIFT: impact: deleterious, score: 0.01;Polyphen-2: impact: benign, score: 0.219	Missense_Mutation	SNP	diploid	1	.	.	.	4	1805533	1805533	C	G	4:g.1805533C>G	ENST00000260795.2:c.1045C>G	0.07		5	69		84	89	2020-07-17
Bladder Urothelial Carcinoma (TCGA, PanCancer Atlas)	TCGA-XF-A9SL-01	Bladder Urothelial Carcinoma	S344Y	OncoKB: Unknown, level NA;CIViC: NA;MyCancerGenome: not present;CancerHotspot: no;3DHotspot: no	MutationAssessor: impact: low, score: 1.615;SIFT: impact: tolerated, score: 0.07;Polyphen-2: impact: benign, score: 0.047	Missense_Mutation	SNP	diploid		.	.	.	4	1805519	1805519	C	A	4:g.1805519C>A	ENST00000260795.2:c.1031C>A	0.06		4	62		83	89	2020-07-17
Uterine Corpus Endometrial Carcinoma (TCGA, PanCancer Atlas)	TCGA-D1-A167-01	Uterine Endometrioid Carcinoma	A717T	OncoKB: Unknown, level NA;CIViC: NA;MyCancerGenome: not present;CancerHotspot: no;3DHotspot: no	MutationAssessor: impact: neutral, score: 0.575;SIFT: impact: tolerated, score: 0.15;Polyphen-2: impact: benign, score: 0.025	Missense_Mutation	SNP	diploid		.	.	.	4	1808391	1808391	G	A	4:g.1808391G>A	ENST00000260795.2:c.2149G>A	0.47		15	17		41	1555	15/17
Skin Cutaneous Melanoma (TCGA, PanCancer Atlas)	TCGA-EE-A2A2-06	Cutaneous Melanoma	S787F	OncoKB: Unknown, level NA;CIViC: NA;MyCancerGenome: not present;CancerHotspot: no;3DHotspot: no	MutationAssessor: impact: medium, score: 2.78;SIFT: impact: deleterious, score: 0.02;Polyphen-2: impact: probably_damaging, score: 0.982	Missense_Mutation	SNP	diploid	1	.	.	.	4	1808928	1808928	C	T	4:g.1808928C>T	ENST00000260795.2:c.2360C>T	0.23		37	125		9	1303	17/17
Skin Cutaneous Melanoma (TCGA, PanCancer Atlas)	TCGA-EE-A29H-06	Cutaneous Melanoma	D576N	OncoKB: Unknown, level NA;CIViC: NA;MyCancerGenome: not present;CancerHotspot: no;3DHotspot: no	MutationAssessor: impact: low, score: 1.19;SIFT: impact: deleterious, score: 0.01;Polyphen-2: impact: possibly_damaging, score: 0.809	Missense_Mutation	SNP	deepdel	1	.	.	.	4	1807557	1807557	G	A	4:g.1807557G>A	ENST00000260795.2:c.1726G>A	0.66		29	15		56	273	2020-12-17
Skin Cutaneous Melanoma (TCGA, PanCancer Atlas)	TCGA-EE-A17X-06	Cutaneous Melanoma	E686K	OncoKB: Unknown, level NA;CIViC: NA;MyCancerGenome: not present;CancerHotspot: no;3DHotspot: no	MutationAssessor: impact: medium, score: 3.365;SIFT: impact: deleterious, score: 0;Polyphen-2: impact: probably_damaging, score: 1	Missense_Mutation	SNP	diploid	2	.	.	.	4	1808298	1808298	G	A	4:g.1808298G>A	ENST00000260795.2:c.2056G>A	0.26		11	31		42	680	15/17
Skin Cutaneous Melanoma (TCGA, PanCancer Atlas)	TCGA-EE-A20F-06	Cutaneous Melanoma	S679F	OncoKB: Unknown, level NA;CIViC: NA;MyCancerGenome: not present;CancerHotspot: no;3DHotspot: no	MutationAssessor: impact: high, score: 4.565;SIFT: impact: deleterious, score: 0;Polyphen-2: impact: probably_damaging, score: 1	Missense_Mutation	SNP	shallowdel	1	.	.	.	4	1808278	1808278	C	T	4:g.1808278C>T	ENST00000260795.2:c.2036C>T	0.26		7	20		67	1844	15/17
Skin Cutaneous Melanoma (TCGA, PanCancer Atlas)	TCGA-EB-A6QY-01	Cutaneous Melanoma	D580H	OncoKB: Unknown, level NA;CIViC: NA;MyCancerGenome: not present;CancerHotspot: no;3DHotspot: no	MutationAssessor: impact: low, score: 1.795;SIFT: impact: deleterious, score: 0.01;Polyphen-2: impact: probably_damaging, score: 0.969	Missense_Mutation	SNP			.	.	.	4	1807569	1807569	G	C	4:g.1807569G>C	ENST00000260795.2:c.1738G>C	0.11		31	251		289	506	2020-12-17
Skin Cutaneous Melanoma (TCGA, PanCancer Atlas)	TCGA-FW-A3R5-06	Cutaneous Melanoma	P696L	OncoKB: Unknown, level NA;CIViC: NA;MyCancerGenome: not present;CancerHotspot: no;3DHotspot: no	MutationAssessor: impact: medium, score: 2.135;SIFT: impact: deleterious, score: 0;Polyphen-2: impact: probably_damaging, score: 1	Missense_Mutation	SNP	diploid	1	.	.	.	4	1808329	1808329	C	T	4:g.1808329C>T	ENST00000260795.2:c.2087C>T	0.22		14	50		66	15825	15/17
Mesothelioma (TCGA, PanCancer Atlas)	TCGA-ZN-A9VV-01	Pleural Mesothelioma, Biphasic Type	S400N	OncoKB: Unknown, level NA;CIViC: NA;MyCancerGenome: not present;CancerHotspot: no;3DHotspot: no	MutationAssessor: impact: neutral, score: 0.74;SIFT: impact: tolerated, score: 0.37;Polyphen-2: impact: benign, score: 0	Missense_Mutation	SNP	diploid		.	.	.	4	1806180	1806180	G	A	4:g.1806180G>A	ENST00000260795.2:c.1199G>A	0.45		54	67		234	33	2020-08-17
Pancreatic Adenocarcinoma (TCGA, PanCancer Atlas)	TCGA-IB-7651-01	Pancreatic Adenocarcinoma	V700A	OncoKB: Unknown, level NA;CIViC: NA;MyCancerGenome: not present;CancerHotspot: no;3DHotspot: no	MutationAssessor: impact: neutral, score: 0.405;SIFT: impact: deleterious, score: 0.01;Polyphen-2: impact: possibly_damaging, score: 0.721	Missense_Mutation	SNP	diploid		.	.	.	4	1808341	1808341	T	C	4:g.1808341T>C	ENST00000260795.2:c.2099T>C	0.22		52	181		49	14306	15/17
Kidney Renal Papillary Cell Carcinoma (TCGA, PanCancer Atlas)	TCGA-KV-A6GD-01	Papillary Renal Cell Carcinoma	L608M	OncoKB: Unknown, level NA;CIViC: NA;MyCancerGenome: not present;CancerHotspot: no;3DHotspot: no	MutationAssessor: impact: medium, score: 2.205;SIFT: impact: deleterious, score: 0;Polyphen-2: impact: probably_damaging, score: 0.998	Missense_Mutation	SNP	diploid	1	.	.	.	4	1807653	1807653	T	A	4:g.1807653T>A	ENST00000260795.2:c.1822T>A	0.33		16	32		51	59	2020-12-17
Kidney Renal Papillary Cell Carcinoma (TCGA, PanCancer Atlas)	TCGA-A4-8630-01	Papillary Renal Cell Carcinoma	R616G	OncoKB: Unknown, level NA;CIViC: NA;MyCancerGenome: not present;CancerHotspot: no;3DHotspot: no	MutationAssessor: impact: medium, score: 2.125;SIFT: impact: deleterious, score: 0;Polyphen-2: impact: probably_damaging, score: 1	Missense_Mutation	SNP	diploid	1	.	.	.	4	1807787	1807787	A	G	4:g.1807787A>G	ENST00000260795.2:c.1846A>G	0.4		10	15		55	48	13/17
Colorectal Adenocarcinoma (TCGA, PanCancer Atlas)	TCGA-CK-4951-01	Mucinous Adenocarcinoma of the Colon and Rectum	D676=	OncoKB: Unknown, level NA;CIViC: NA;MyCancerGenome: not present;CancerHotspot: no;3DHotspot: no	MutationAssessor: NA;SIFT: NA;Polyphen-2: NA	Splice_Region	SNP	diploid		.	.	.	4	1808052	1808052	C	T	4:g.1808052C>T	ENST00000260795.2:c.2028C>T	0.21		6	22		91	4191	14/17
Prostate Adenocarcinoma (TCGA, PanCancer Atlas)	TCGA-XK-AAIR-01	Prostate Adenocarcinoma	D676=	OncoKB: Unknown, level NA;CIViC: NA;MyCancerGenome: not present;CancerHotspot: no;3DHotspot: no	MutationAssessor: NA;SIFT: NA;Polyphen-2: NA	Splice_Region	SNP	diploid		.	.	.	4	1808052	1808052	C	T	4:g.1808052C>T	ENST00000260795.2:c.2028C>T	0.08		3	34		45	25	14/17
Colorectal Adenocarcinoma (TCGA, PanCancer Atlas)	TCGA-AD-6889-01	Colon Adenocarcinoma	R469Q	OncoKB: Unknown, level NA;CIViC: NA;MyCancerGenome: not present;CancerHotspot: no;3DHotspot: no	MutationAssessor: impact: high, score: 3.74;SIFT: impact: deleterious, score: 0;Polyphen-2: impact: probably_damaging, score: 0.934	Missense_Mutation	SNP	diploid	1	.	.	.	4	1806690	1806690	G	A	4:g.1806690G>A	ENST00000260795.2:c.1406G>A	0.48		42	46		145	1703	2020-09-17
Colorectal Adenocarcinoma (TCGA, PanCancer Atlas)	TCGA-CM-6162-01	Mucinous Adenocarcinoma of the Colon and Rectum	T806M	OncoKB: Unknown, level NA;CIViC: NA;MyCancerGenome: not present;CancerHotspot: no;3DHotspot: no	MutationAssessor: impact: low, score: 1.5;SIFT: impact: deleterious_low_confidence, score: 0;Polyphen-2: impact: possibly_damaging, score: 0.828	Missense_Mutation	SNP	diploid	1	.	.	.	4	1808985	1808985	C	T	4:g.1808985C>T	ENST00000260795.2:c.2417C>T	0.44		7	9		28	1001	17/17
Lung Squamous Cell Carcinoma (TCGA, PanCancer Atlas)	TCGA-NC-A5HI-01	Lung Squamous Cell Carcinoma	D758=	OncoKB: Unknown, level NA;CIViC: NA;MyCancerGenome: not present;CancerHotspot: no;3DHotspot: no	MutationAssessor: NA;SIFT: NA;Polyphen-2: NA	Splice_Region	SNP	shallowdel		.	.	.	4	1808661	1808661	C	T	4:g.1808661C>T	ENST00000260795.2:c.2274C>T	0.33		4	8		17	385	16/17
Skin Cutaneous Melanoma (TCGA, PanCancer Atlas)	TCGA-W3-AA1V-06	Cutaneous Melanoma	S130F	OncoKB: Unknown, level NA;CIViC: NA;MyCancerGenome: not present;CancerHotspot: no;3DHotspot: no	MutationAssessor: impact: medium, score: 2.445;SIFT: impact: tolerated, score: 0.06;Polyphen-2: impact: possibly_damaging, score: 0.807	Missense_Mutation	SNP	shallowdel		.	.	.	4	1801483	1801483	C	T	4:g.1801483C>T	ENST00000260795.2:c.389C>T	0.28		5	13		23	4559	2020-03-17
Stomach Adenocarcinoma (TCGA, PanCancer Atlas)	TCGA-VQ-A8E3-01	Intestinal Type Stomach Adenocarcinoma	G549R	OncoKB: Unknown, level NA;CIViC: NA;MyCancerGenome: not present;CancerHotspot: no;3DHotspot: no	MutationAssessor: impact: low, score: 1.155;SIFT: impact: deleterious, score: 0;Polyphen-2: impact: probably_damaging, score: 0.991	Missense_Mutation	SNP	shallowdel		.	.	.	4	1807396	1807396	G	A	4:g.1807396G>A	ENST00000260795.2:c.1645G>A	0.09		3	31		59	682	2020-11-17
Uterine Corpus Endometrial Carcinoma (TCGA, PanCancer Atlas)	TCGA-AP-A1DK-01	Uterine Endometrioid Carcinoma	A569T	OncoKB: Unknown, level NA;CIViC: NA;MyCancerGenome: not present;CancerHotspot: no;3DHotspot: no	MutationAssessor: impact: neutral, score: 0.39;SIFT: impact: deleterious, score: 0.02;Polyphen-2: impact: benign, score: 0.422	Missense_Mutation	SNP	diploid	1	.	.	.	4	1807536	1807536	G	A	4:g.1807536G>A	ENST00000260795.2:c.1705G>A	0.25		21	63		59	10312	2020-12-17
Breast Invasive Carcinoma (TCGA, PanCancer Atlas)	TCGA-EW-A2FV-01	Breast Invasive Carcinoma (NOS)	G692Afs*16	OncoKB: Unknown, level NA;CIViC: NA;MyCancerGenome: not present;CancerHotspot: no;3DHotspot: no	MutationAssessor: NA;SIFT: NA;Polyphen-2: NA	Frame_Shift_Del	DEL	gain		.	.	.	4	1808312	1808312	G	-	4:g.1808312del	ENST00000260795.2:c.2075del	0.1		5	44		27	3877	15/17
Colorectal Adenocarcinoma (TCGA, PanCancer Atlas)	TCGA-A6-5665-01	Colon Adenocarcinoma	A429V	OncoKB: Unknown, level NA;CIViC: NA;MyCancerGenome: not present;CancerHotspot: no;3DHotspot: no	MutationAssessor: impact: neutral, score: 0.345;SIFT: impact: deleterious, score: 0.05;Polyphen-2: impact: benign, score: 0.003	Missense_Mutation	SNP	diploid	1	.	.	.	4	1806570	1806570	C	T	4:g.1806570C>T	ENST00000260795.2:c.1286C>T	0.3		35	82		354	1858	2020-09-17
Colorectal Adenocarcinoma (TCGA, PanCancer Atlas)	TCGA-AA-3947-01	Mucinous Adenocarcinoma of the Colon and Rectum	G697Afs*11	OncoKB: Unknown, level NA;CIViC: NA;MyCancerGenome: not present;CancerHotspot: no;3DHotspot: no	MutationAssessor: NA;SIFT: NA;Polyphen-2: NA	Frame_Shift_Del	DEL	diploid		.	.	.	4	1808327	1808327	C	-	4:g.1808327del	ENST00000260795.2:c.2088del	0.08		12	136		145	2295	15/17
Colorectal Adenocarcinoma (TCGA, PanCancer Atlas)	TCGA-AA-A010-01	Colon Adenocarcinoma	Q209R	OncoKB: Unknown, level NA;CIViC: NA;MyCancerGenome: not present;CancerHotspot: no;3DHotspot: no	MutationAssessor: impact: neutral, score: 0.19;SIFT: impact: tolerated, score: 0.12;Polyphen-2: impact: benign, score: 0.082	Missense_Mutation	SNP	diploid	2	.	.	.	4	1803357	1803357	A	G	4:g.1803357A>G	ENST00000260795.2:c.626A>G	0.34	0.0027	35	69	1	373	7496	2020-05-17
Colorectal Adenocarcinoma (TCGA, PanCancer Atlas)	TCGA-AD-6895-01	Colon Adenocarcinoma	D646N	OncoKB: Unknown, level NA;CIViC: NA;MyCancerGenome: not present;CancerHotspot: no;3DHotspot: no	MutationAssessor: impact: low, score: 1.08;SIFT: impact: deleterious, score: 0.02;Polyphen-2: impact: probably_damaging, score: 1	Missense_Mutation	SNP	diploid	3	.	.	.	4	1807877	1807877	G	A	4:g.1807877G>A	ENST00000260795.2:c.1936G>A	0.21		11	41		93	1534	13/17
Colorectal Adenocarcinoma (TCGA, PanCancer Atlas)	TCGA-AD-6964-01	Colon Adenocarcinoma	A36T	OncoKB: Unknown, level NA;CIViC: NA;MyCancerGenome: not present;CancerHotspot: no;3DHotspot: no	MutationAssessor: impact: low, score: 1.04;SIFT: impact: tolerated_low_confidence, score: 0.45;Polyphen-2: impact: benign, score: 0	Missense_Mutation	SNP	diploid	1	.	.	.	4	1795767	1795767	G	A	4:g.1795767G>A	ENST00000260795.2:c.106G>A	0.18		10	45		167	1409	2020-01-17
Colorectal Adenocarcinoma (TCGA, PanCancer Atlas)	TCGA-AZ-4308-01	Colon Adenocarcinoma	N644I	OncoKB: Unknown, level NA;CIViC: NA;MyCancerGenome: not present;CancerHotspot: no;3DHotspot: no	MutationAssessor: impact: low, score: 1.43;SIFT: impact: deleterious, score: 0;Polyphen-2: impact: probably_damaging, score: 0.993	Missense_Mutation	SNP	diploid		.	.	.	4	1807872	1807872	A	T	4:g.1807872A>T	ENST00000260795.2:c.1931A>T	0.39		24	38		83	73	13/17
Colorectal Adenocarcinoma (TCGA, PanCancer Atlas)	TCGA-AZ-4315-01	Colon Adenocarcinoma	E194K	OncoKB: Unknown, level NA;CIViC: NA;MyCancerGenome: not present;CancerHotspot: no;3DHotspot: no	MutationAssessor: impact: low, score: 1.225;SIFT: impact: tolerated, score: 0.09;Polyphen-2: impact: possibly_damaging, score: 0.6	Missense_Mutation	SNP	diploid	2	.	.	.	4	1803228	1803228	G	A	4:g.1803228G>A	ENST00000260795.2:c.580G>A	0.32		11	23		85	6315	2020-04-17
Colorectal Adenocarcinoma (TCGA, PanCancer Atlas)	TCGA-F4-6856-01	Mucinous Adenocarcinoma of the Colon and Rectum	V505I	OncoKB: Unknown, level NA;CIViC: NA;MyCancerGenome: not present;CancerHotspot: no;3DHotspot: no	MutationAssessor: impact: low, score: 1.77;SIFT: impact: deleterious, score: 0;Polyphen-2: impact: benign, score: 0.416	Missense_Mutation	SNP	diploid	1	.	.	.	4	1807182	1807182	G	A	4:g.1807182G>A	ENST00000260795.2:c.1513G>A	0.31		9	20		16	961	2020-10-17
Colorectal Adenocarcinoma (TCGA, PanCancer Atlas)	TCGA-NH-A5IV-01	Colon Adenocarcinoma	R86H	OncoKB: Unknown, level NA;CIViC: NA;MyCancerGenome: not present;CancerHotspot: no;3DHotspot: no	MutationAssessor: impact: medium, score: 2.81;SIFT: impact: tolerated, score: 0.05;Polyphen-2: impact: benign, score: 0.146	Missense_Mutation	SNP	diploid		.	.	.	4	1801128	1801128	G	A	4:g.1801128G>A	ENST00000260795.2:c.257G>A	0.39		35	55		93	2375	2020-02-17
Colorectal Adenocarcinoma (TCGA, PanCancer Atlas)	TCGA-WS-AB45-01	Mucinous Adenocarcinoma of the Colon and Rectum	G335R	OncoKB: Unknown, level NA;CIViC: NA;MyCancerGenome: not present;CancerHotspot: no;3DHotspot: no	MutationAssessor: impact: high, score: 3.57;SIFT: impact: deleterious, score: 0;Polyphen-2: impact: probably_damaging, score: 0.999	Missense_Mutation	SNP	diploid		.	.	.	4	1805491	1805491	G	A	4:g.1805491G>A	ENST00000260795.2:c.1003G>A	0.17		13	65		129	2521	2020-07-17
Glioblastoma Multiforme (TCGA, PanCancer Atlas)	TCGA-06-5416-01	Glioblastoma Multiforme	A514V	OncoKB: Unknown, level NA;CIViC: NA;MyCancerGenome: not present;CancerHotspot: no;3DHotspot: no	MutationAssessor: impact: low, score: 1.645;SIFT: impact: deleterious, score: 0.01;Polyphen-2: impact: probably_damaging, score: 0.989	Missense_Mutation	SNP	shallowdel		.	.	.	4	1807292	1807292	C	T	4:g.1807292C>T	ENST00000260795.2:c.1541C>T	0.16		8	43		43	12178	2020-11-17
Head and Neck Squamous Cell Carcinoma (TCGA, PanCancer Atlas)	TCGA-CV-7104-01	Head and Neck Squamous Cell Carcinoma	T311=	OncoKB: Unknown, level NA;CIViC: NA;MyCancerGenome: not present;CancerHotspot: no;3DHotspot: no	MutationAssessor: NA;SIFT: NA;Polyphen-2: NA	Splice_Region	SNP	diploid		.	.	.	4	1805421	1805421	G	T	4:g.1805421G>T	ENST00000260795.2:c.933G>T	0.09		3	30		40	121	2020-07-17
Kidney Renal Papillary Cell Carcinoma (TCGA, PanCancer Atlas)	TCGA-HE-7130-01	Papillary Renal Cell Carcinoma	M725I	OncoKB: Unknown, level NA;CIViC: NA;MyCancerGenome: not present;CancerHotspot: no;3DHotspot: no	MutationAssessor: impact: neutral, score: 0.295;SIFT: impact: deleterious, score: 0.01;Polyphen-2: impact: benign, score: 0.267	Missense_Mutation	SNP	diploid	1	.	.	.	4	1808562	1808562	G	A	4:g.1808562G>A	ENST00000260795.2:c.2175G>A	0.82		9	2		21	351	16/17
Brain Lower Grade Glioma (TCGA, PanCancer Atlas)	TCGA-DU-6392-01	Astrocytoma	P39T	OncoKB: Unknown, level NA;CIViC: NA;MyCancerGenome: not present;CancerHotspot: no;3DHotspot: no	MutationAssessor: impact: low, score: 0.895;SIFT: impact: tolerated_low_confidence, score: 0.06;Polyphen-2: impact: benign, score: 0.055	Missense_Mutation	SNP	diploid		.	.	.	4	1800986	1800986	C	A	4:g.1800986C>A	ENST00000260795.2:c.115C>A	0.07		7	89		109	10863	2020-02-17
Brain Lower Grade Glioma (TCGA, PanCancer Atlas)	TCGA-DU-6392-01	Astrocytoma	V677=	OncoKB: Unknown, level NA;CIViC: NA;MyCancerGenome: not present;CancerHotspot: no;3DHotspot: no	MutationAssessor: NA;SIFT: NA;Polyphen-2: NA	Splice_Region	SNP	diploid		.	.	.	4	1808273	1808273	C	T	4:g.1808273C>T	ENST00000260795.2:c.2031C>T	0.43		18	24		43	10863	15/17
Skin Cutaneous Melanoma (TCGA, PanCancer Atlas)	TCGA-D3-A2JC-06	Cutaneous Melanoma	G54V	OncoKB: Unknown, level NA;CIViC: NA;MyCancerGenome: not present;CancerHotspot: no;3DHotspot: no	MutationAssessor: impact: high, score: 4.44;SIFT: impact: deleterious, score: 0;Polyphen-2: impact: probably_damaging, score: 0.999	Missense_Mutation	SNP	diploid		.	.	.	4	1801032	1801032	G	T	4:g.1801032G>T	ENST00000260795.2:c.161G>T	0.09		4	39		215	3142	2020-02-17
Skin Cutaneous Melanoma (TCGA, PanCancer Atlas)	TCGA-D3-A2JO-06	Cutaneous Melanoma	W287L	OncoKB: Unknown, level NA;CIViC: NA;MyCancerGenome: not present;CancerHotspot: no;3DHotspot: no	MutationAssessor: impact: medium, score: 3.245;SIFT: impact: deleterious, score: 0.01;Polyphen-2: impact: probably_damaging, score: 0.964	Missense_Mutation	SNP	shallowdel		.	.	.	4	1803682	1803682	G	T	4:g.1803682G>T	ENST00000260795.2:c.860G>T	0.08		3	33		54	1288	2020-06-17
Skin Cutaneous Melanoma (TCGA, PanCancer Atlas)	TCGA-EE-A184-06	Cutaneous Melanoma	R728L	OncoKB: Unknown, level NA;CIViC: NA;MyCancerGenome: not present;CancerHotspot: no;3DHotspot: no	MutationAssessor: impact: neutral, score: -0.255;SIFT: impact: deleterious, score: 0;Polyphen-2: impact: possibly_damaging, score: 0.511	Missense_Mutation	SNP	gain		.	.	.	4	1808570	1808570	G	T	4:g.1808570G>T	ENST00000260795.2:c.2183G>T	0.17		3	15		22	1086	16/17
Skin Cutaneous Melanoma (TCGA, PanCancer Atlas)	TCGA-EE-A2GT-06	Cutaneous Melanoma	G475C	OncoKB: Unknown, level NA;CIViC: NA;MyCancerGenome: not present;CancerHotspot: no;3DHotspot: no	MutationAssessor: impact: medium, score: 2.105;SIFT: impact: deleterious, score: 0;Polyphen-2: impact: probably_damaging, score: 0.998	Missense_Mutation	SNP	diploid		.	.	.	4	1807092	1807092	G	T	4:g.1807092G>T	ENST00000260795.2:c.1423G>T	0.11		3	24		59	1691	2020-10-17
Skin Cutaneous Melanoma (TCGA, PanCancer Atlas)	TCGA-EE-A3AB-06	Cutaneous Melanoma	E701*	OncoKB: Unknown, level NA;CIViC: NA;MyCancerGenome: not present;CancerHotspot: no;3DHotspot: no	MutationAssessor: NA;SIFT: NA;Polyphen-2: NA	Nonsense_Mutation	SNP	shallowdel		.	.	.	4	1808343	1808343	G	T	4:g.1808343G>T	ENST00000260795.2:c.2101G>T	0.09		3	32		31	658	15/17
Skin Cutaneous Melanoma (TCGA, PanCancer Atlas)	TCGA-ER-A19F-06	Cutaneous Melanoma	G80W	OncoKB: Unknown, level NA;CIViC: NA;MyCancerGenome: not present;CancerHotspot: no;3DHotspot: no	MutationAssessor: impact: neutral, score: 0.69;SIFT: impact: deleterious, score: 0.02;Polyphen-2: impact: probably_damaging, score: 0.92	Missense_Mutation	SNP	diploid		.	.	.	4	1801109	1801109	G	T	4:g.1801109G>T	ENST00000260795.2:c.238G>T	0.12		3	23		33	1662	2020-02-17
Skin Cutaneous Melanoma (TCGA, PanCancer Atlas)	TCGA-ER-A19P-06	Cutaneous Melanoma	K742N	OncoKB: Unknown, level NA;CIViC: NA;MyCancerGenome: not present;CancerHotspot: no;3DHotspot: no	MutationAssessor: impact: neutral, score: 0.55;SIFT: impact: deleterious, score: 0.03;Polyphen-2: impact: benign, score: 0.292	Missense_Mutation	SNP	diploid		.	.	.	4	1808613	1808613	G	T	4:g.1808613G>T	ENST00000260795.2:c.2226G>T	0.15		4	22		15	2916	16/17
Skin Cutaneous Melanoma (TCGA, PanCancer Atlas)	TCGA-FR-A7U9-06	Cutaneous Melanoma	A99V	OncoKB: Unknown, level NA;CIViC: NA;MyCancerGenome: not present;CancerHotspot: no;3DHotspot: no	MutationAssessor: impact: low, score: 0.82;SIFT: impact: tolerated, score: 1;Polyphen-2: impact: benign, score: 0.014	Missense_Mutation	SNP	diploid		.	.	.	4	1801167	1801167	C	T	4:g.1801167C>T	ENST00000260795.2:c.296C>T	0.27		4	11		24	1509	2020-02-17
Skin Cutaneous Melanoma (TCGA, PanCancer Atlas)	TCGA-WE-A8K5-06	Cutaneous Melanoma	G137E	OncoKB: Unknown, level NA;CIViC: NA;MyCancerGenome: not present;CancerHotspot: no;3DHotspot: no	MutationAssessor: impact: neutral, score: 0.695;SIFT: impact: tolerated, score: 0.53;Polyphen-2: impact: benign, score: 0.003	Missense_Mutation	SNP	diploid		.	.	.	4	1801504	1801504	G	A	4:g.1801504G>A	ENST00000260795.2:c.410G>A	0.35		8	15		27	947	2020-03-17
Skin Cutaneous Melanoma (TCGA, PanCancer Atlas)	TCGA-Z2-AA3S-06	Cutaneous Melanoma	P699L	OncoKB: Unknown, level NA;CIViC: NA;MyCancerGenome: not present;CancerHotspot: no;3DHotspot: no	MutationAssessor: impact: low, score: 1.685;SIFT: impact: deleterious, score: 0;Polyphen-2: impact: probably_damaging, score: 0.998	Missense_Mutation	SNP	diploid		.	.	.	4	1808338	1808338	C	T	4:g.1808338C>T	ENST00000260795.2:c.2096C>T	0.55		18	15		45	171	15/17
Stomach Adenocarcinoma (TCGA, PanCancer Atlas)	TCGA-VQ-A8PB-01	Papillary Stomach Adenocarcinoma	V73A	OncoKB: Unknown, level NA;CIViC: NA;MyCancerGenome: not present;CancerHotspot: no;3DHotspot: no	MutationAssessor: impact: neutral, score: 0.43;SIFT: impact: tolerated, score: 0.55;Polyphen-2: impact: benign, score: 0.003	Missense_Mutation	SNP	diploid		.	.	.	4	1801089	1801089	T	C	4:g.1801089T>C	ENST00000260795.2:c.218T>C	0.45		25	31		57	740	2020-02-17
Stomach Adenocarcinoma (TCGA, PanCancer Atlas)	TCGA-VQ-A8PP-01	Tubular Stomach Adenocarcinoma	V277M	OncoKB: Unknown, level NA;CIViC: NA;MyCancerGenome: not present;CancerHotspot: no;3DHotspot: no	MutationAssessor: impact: medium, score: 2.615;SIFT: impact: deleterious, score: 0.01;Polyphen-2: impact: probably_damaging, score: 0.99	Missense_Mutation	SNP	diploid		.	.	.	4	1803651	1803651	G	A	4:g.1803651G>A	ENST00000260795.2:c.829G>A	0.23		8	27		59	1327	2020-06-17
Uterine Corpus Endometrial Carcinoma (TCGA, PanCancer Atlas)	TCGA-AP-A1E1-01	Uterine Endometrioid Carcinoma	A500V	OncoKB: Unknown, level NA;CIViC: NA;MyCancerGenome: not present;CancerHotspot: no;3DHotspot: no	MutationAssessor: impact: neutral, score: 0.51;SIFT: impact: tolerated, score: 0.19;Polyphen-2: impact: benign, score: 0.038	Missense_Mutation	SNP	diploid	1	.	.	.	4	1807168	1807168	C	T	4:g.1807168C>T	ENST00000260795.2:c.1499C>T	0.16		5	26		37	554	2020-10-17
Uterine Corpus Endometrial Carcinoma (TCGA, PanCancer Atlas)	TCGA-AX-A1CE-01	Uterine Endometrioid Carcinoma	R442M	OncoKB: Unknown, level NA;CIViC: NA;MyCancerGenome: not present;CancerHotspot: no;3DHotspot: no	MutationAssessor: impact: medium, score: 2.585;SIFT: impact: deleterious, score: 0.01;Polyphen-2: impact: possibly_damaging, score: 0.903	Missense_Mutation	SNP	diploid		.	.	.	4	1806609	1806609	G	T	4:g.1806609G>T	ENST00000260795.2:c.1325G>T	0.5		15	15		20	11440	2020-09-17
Uterine Corpus Endometrial Carcinoma (TCGA, PanCancer Atlas)	TCGA-AX-A2HD-01	Uterine Endometrioid Carcinoma	I201V	OncoKB: Unknown, level NA;CIViC: NA;MyCancerGenome: not present;CancerHotspot: no;3DHotspot: no	MutationAssessor: impact: neutral, score: 0.105;SIFT: impact: deleterious, score: 0.04;Polyphen-2: impact: possibly_damaging, score: 0.641	Missense_Mutation	SNP	diploid		.	.	.	4	1803249	1803249	A	G	4:g.1803249A>G	ENST00000260795.2:c.601A>G	0.41		7	10		24	7848	2020-04-17
Uterine Corpus Endometrial Carcinoma (TCGA, PanCancer Atlas)	TCGA-DF-A2KN-01	Uterine Endometrioid Carcinoma	X723_splice	OncoKB: Unknown, level NA;CIViC: NA;MyCancerGenome: not present;CancerHotspot: no;3DHotspot: no	MutationAssessor: NA;SIFT: NA;Polyphen-2: NA	Splice_Site	SNP	diploid		.	.	.	4	1808411	1808411	G	A	4:g.1808411G>A	ENST00000260795.2:c.2168+1G>A	0.46		12	14		23	4342
Uterine Corpus Endometrial Carcinoma (TCGA, PanCancer Atlas)	TCGA-DI-A1BU-01	Uterine Mixed Endometrial Carcinoma	M69Wfs*29	OncoKB: Unknown, level NA;CIViC: NA;MyCancerGenome: not present;CancerHotspot: no;3DHotspot: no	MutationAssessor: NA;SIFT: NA;Polyphen-2: NA	Frame_Shift_Del	DEL	diploid		.	.	.	4	1801073	1801073	C	-	4:g.1801073del	ENST00000260795.2:c.204del	0.33		7	14		17	7642	2020-02-17
Uterine Corpus Endometrial Carcinoma (TCGA, PanCancer Atlas)	TCGA-DI-A1BU-01	Uterine Mixed Endometrial Carcinoma	Y337H	OncoKB: Unknown, level NA;CIViC: NA;MyCancerGenome: not present;CancerHotspot: no;3DHotspot: no	MutationAssessor: impact: high, score: 4.13;SIFT: impact: deleterious, score: 0;Polyphen-2: impact: probably_damaging, score: 0.998	Missense_Mutation	SNP	diploid		.	.	.	4	1805497	1805497	T	C	4:g.1805497T>C	ENST00000260795.2:c.1009T>C	0.3		39	92		60	7642	2020-07-17
Uterine Corpus Endometrial Carcinoma (TCGA, PanCancer Atlas)	TCGA-EY-A215-01	Uterine Endometrioid Carcinoma	A441T	OncoKB: Unknown, level NA;CIViC: NA;MyCancerGenome: not present;CancerHotspot: no;3DHotspot: no	MutationAssessor: impact: neutral, score: -0.425;SIFT: impact: tolerated, score: 1;Polyphen-2: impact: benign, score: 0.003	Missense_Mutation	SNP	diploid		.	.	.	4	1806605	1806605	G	A	4:g.1806605G>A	ENST00000260795.2:c.1321G>A	0.37		44	76		117	4650	2020-09-17
Uterine Corpus Endometrial Carcinoma (TCGA, PanCancer Atlas)	TCGA-FI-A2D5-01	Uterine Endometrioid Carcinoma	A441T	OncoKB: Unknown, level NA;CIViC: NA;MyCancerGenome: not present;CancerHotspot: no;3DHotspot: no	MutationAssessor: impact: neutral, score: -0.425;SIFT: impact: tolerated, score: 1;Polyphen-2: impact: benign, score: 0.003	Missense_Mutation	SNP	diploid		.	.	.	4	1806605	1806605	G	A	4:g.1806605G>A	ENST00000260795.2:c.1321G>A	0.37		44	75		101	13865	2020-09-17
Uterine Corpus Endometrial Carcinoma (TCGA, PanCancer Atlas)	TCGA-EY-A5W2-01	Uterine Endometrioid Carcinoma	L425P	OncoKB: Unknown, level NA;CIViC: NA;MyCancerGenome: not present;CancerHotspot: no;3DHotspot: no	MutationAssessor: impact: medium, score: 2.125;SIFT: impact: deleterious, score: 0.01;Polyphen-2: impact: possibly_damaging, score: 0.514	Missense_Mutation	SNP	diploid		.	.	.	4	1806558	1806558	T	C	4:g.1806558T>C	ENST00000260795.2:c.1274T>C	0.49		31	32		44	772	2020-09-17
Uterine Corpus Endometrial Carcinoma (TCGA, PanCancer Atlas)	TCGA-FI-A2F4-01	Uterine Endometrioid Carcinoma	M526T	OncoKB: Unknown, level NA;CIViC: NA;MyCancerGenome: not present;CancerHotspot: no;3DHotspot: no	MutationAssessor: impact: neutral, score: 0.725;SIFT: impact: deleterious, score: 0;Polyphen-2: impact: probably_damaging, score: 1	Missense_Mutation	SNP	diploid		.	.	.	4	1807328	1807328	T	C	4:g.1807328T>C	ENST00000260795.2:c.1577T>C	0.43		20	27		70	1908	2020-11-17
Uterine Carcinosarcoma (TCGA, PanCancer Atlas)	TCGA-N8-A4PN-01	Uterine Carcinosarcoma/Uterine Malignant Mixed Mullerian Tumor	D758V	OncoKB: Unknown, level NA;CIViC: NA;MyCancerGenome: not present;CancerHotspot: no;3DHotspot: no	MutationAssessor: impact: low, score: 1.27;SIFT: impact: deleterious, score: 0;Polyphen-2: impact: benign, score: 0.266	Missense_Mutation	SNP	gain		.	.	.	4	1808660	1808660	A	T	4:g.1808660A>T	ENST00000260795.2:c.2273A>T	0.24		4	13		12	46	16/17
